# Supplementary material for: NOTCH1-mutated chronic lymphocytic leukemia displays high endoplasmic reticulum stress response with druggable potential
Source: Front Oncol. 2023 Sep 25;13:1218989. doi: 10.3389/fonc.2023.1218989 (PMC10561002; doi:10.3389/fonc.2023.1218989)
Supplement: Supplementary file 2 [file DataSheet_2.xlsx]

## Sheet: SUPPLEMENTARY TABLE S3
Supplementary Table S3. Sequences of primers used for RT-PCR
Primer name	Primer Sequence
ATF4 forward	5'-CCAACAACAGCAAGGAGGAT-3'
ATF4 reverse	3'-GTGTCATCCAACGTGGTCAG-5'
CHOP forward	5'-GATTCCAGTCAGAGCTCCCT-3'
CHOP reverse	3'-GTAGTGTGGCCCAAGTGGGG-5'
HSPA5/BIP forward	5'-CTGTCCAGGCTGGTGTGCTCT-3'
HSPA5/BIP reverse	3'-CTTGGTAGGCACCACTGTGTTC-5'
HSP90B1 forward	5'-GGAGAGTCGTGAAGCAGTTGAG-3'
HSP90B1 reverse	3'-CCACCAAAGCACACGGAGATTC-5'
ASNS forward	5'-CTGTGAAGAACAACCTCAGGATC-3'
ASNS reverse	3'-AACAGAGTGGCAGCAACCAAGC-5'
CCL2 forward	5'-AGAATCACCAGCAGCAAGTGTCC-3'
CCL2 reverse	3'-TCCTGAACCCACTTCTGCTTGG-5'
EIF2AK3/PERK forward	5'-TGCCTTGGATCCTGAAAATC-3'
EIF2AK3/PERK reverse	3'-ATGCTTTCACGGTCTTGGTC-5'
PPP1R15A/GADD34 forward	5'-TTCCGAGTGGCCATCTATGT-3'
PPP1R15A/GADD34 reverse	3'-ACAGCCAGGAAATGGACAGT-5'
HMOX1 forward	5'-CCAGGCAGAGAATGCTGAGTTC-3'
HMOX1 reverse	3'-AAGACTGGGCTCTCCTTGTTGC-5'
ATF3 forward	5'-GTGCCGAAACAAGAAGAAGG-3'
ATF3 reverse	3'-TGGAGTCCTCCCATTCTGAG-5'
NOTCH1 forward	5'-GAGGCGTGGCAGACTATGC-3'
NOTCH1 reverse	3'-CTTGTACTCCGTCAGCGTGA-5'
HES1 forward	5'-AAGAAAGATAGCTCGCGGCAT-3'
HES1 reverse	3'-CCAGCACACTTGGGTCTGT-5'
DTX1 forward	5'-CAGCCGCCTGGGAAGATGGAG-3'
DTX1 reverse	3'-TGGATGCCTGTGGGGATGTCA-5'
CMYC forward	5'-CTTCTCTCCGTCCTCGGATTCT-3'
CMYC reverse	3'-GAAGGTGATCCAGACTCTGACCTT-5'
GAPDH forward	5'-ATGGGGAAGGTGAAGGTCG-3'
GAPDH reverse	3'-GGGGTCATTGATGGCAACAATA-5'
mHES1 forward	5'-CCAAGCTAGAGAAGGCAGACA-3'
mHES1 reverse	3'-GTCACCTCGTTCATGCACTC-5'
mDTX1 forward	5'-ATCAGTTCCGGCAAGACACAG-3'
mDTX1 reverse	3'-CGATGAGAGGTCGAGGCCAC-5'
mATF4 forward	5'-AACCTCATGGGTTCTCCAGCGA-3'
mATF4 reverse	3'-CTCCAACATCCAATCTGTCCCG-5'
mCHOP forward	5'-GGAGGTCCTGTCCTCAGATGAA-3'
mCHOP reverse	3'-GCTCCTCTGTCAGCCAAGCTAG-5'
mGAPDH forward	5'-CATCACTGCCACCCAGAAGACTG-3'
mGAPDH reverse	3'-ATGCCAGTGAGCTTCCCGTTCAG-5'

## Sheet: SUPPLEMENTARY TABLE S4
Supplementary Table S4. Genes differentially expressed among studies (pfp<0.05)
Up-regulated genes								Down-regulated genes
Genes	pfp	Genes	pfp	Genes	pfp	Genes	pfp	Genes	pfp
ACSL1	0.011	DGKA	0.003	KRT23	0.010	TXNIP	0.000	AES	0.001
ACSL6	0.036	DHRS9	0.003	L1TD1	0.015	TYROBP	0.005	AKAP2	0.036
ACSM3	0.025	DNAJA4	0.044	LAG3	0.002	UBC	0.000	APOD	0.000
ACTB	0.001	DNAJB1	0.013	LAIR2	0.000	UCHL1	0.006	ARF1	0.041
ACTG1	0.001	DOCK4	0.024	LAMP3	0.039	UTS2	0.034	BCAS4	0.029
ADAM8	0.001	DOCK5	0.049	LCP1	0.002	VASH1	0.010	BCL2	0.004
ADCY9	0.010	DTX1	0.004	LCP2	0.014	VASP	0.028	C11orf80	0.043
AGPAT5	0.033	DUSP1	0.006	LDHA	0.050	VCAN	0.024	C6orf105	0.004
AHR	0.021	DUSP2	0.022	LDHB	0.001	VIM	0.008	CABLES1	0.003
AIF1	0.006	DUSP6	0.007	LGALS1	0.002	VNN3	0.041	CACNB2	0.017
AMICA1	0.014	DYNLL1	0.049	LGALS2	0.003	WSB2	0.035	CAMK2D	0.029
ANGPT2	0.036	DYSF	0.044	LILRA5	0.040	ZAP70	0.001	CCND3	0.015
ANK3	0.022	EEF1A1	0.001	LMNA	0.025	ZFAND6	0.042	CD200	0.003
ANKRD13A	0.015	EFHD2	0.047	LMO2	0.045	ZFP36	0.001	CD22	0.011
ANKRD55	0.008	EGR1	0.001	LPAR6	0.018	ZFP36L1	0.003	CD37	0.000
ANXA1	0.002	EIF1	0.008	LPCAT2	0.007	ZFP36L2	0.002	CD52	0.000
ANXA3	0.021	EIF3H	0.035	LRMP	0.030	ZNF266	0.001	CD53	0.036
AOAH	0.025	EIF4G2	0.009	LRRC4	0.014	ZNF300	0.006	CD79A	0.006
APOBEC3A	0.011	EMP1	0.010	LST1	0.016	ZNF683	0.046	CD79B	0.000
AQP9	0.017	EMR2	0.027	LTB	0.003	ZNF711	0.035	CD81	0.010
ARG1	0.033	EMR3	0.021	MAFB	0.012			CD82	0.000
ARHGAP4	0.023	ETV7	0.007	MAL	0.039			CD83	0.026
ARHGDIB	0.000	EZR	0.004	MARCKS	0.034			CIRBP	0.001
ARHGEF11	0.046	F2RL1	0.009	MARCO	0.050			CNTNAP2	0.002
ARPC2	0.017	FAM129A	0.033	MBOAT2	0.034			COCH	0.002
ARPC3	0.004	FAM134B	0.048	MCL1	0.002			COL9A2	0.001
ARRB1	0.028	FAM198B	0.009	MGAM	0.022			CPNE5	0.037
ARRB2	0.024	FAM49A	0.035	MGAT4A	0.039			CPSF1	0.015
ARRDC3	0.011	FAM60A	0.036	MME	0.024			CRIP1	0.008
ARRDC4	0.001	FAM65B	0.019	MNDA	0.018			CRIP2	0.021
ASCL2	0.041	FCER1G	0.045	MS4A3	0.043			CRIP3	0.041
ASGR2	0.037	FCGR1B	0.003	MS4A4A	0.035			CTLA4	0.000
ASNS	0.046	FCGR2A	0.007	MS4A6A	0.006			CTSH	0.005
ATF4	0.024	FCGR3A	0.000	MSI2	0.001			CXCR4	0.000
ATG16L2	0.006	FCN1	0.002	MT2A	0.047			CYBASC3	0.009
ATP5B	0.016	FFAR2	0.009	MXD1	0.025			DLGAP4	0.038
ATP5E	0.022	FGFBP2	0.024	MYCL1	0.025			DMRTA1	0.002
ATP5G2	0.037	FGL2	0.014	MYL6	0.001			EEF2	0.001
AXIN2	0.046	FGR	0.004	MYLIP	0.035			EIF1B	0.031
B2M	0.000	FLJ13197	0.036	MYLK	0.015			ENPP2	0.001
B3GNT5	0.029	FOS	0.000	MYO1F	0.024			ETS1	0.004
BAIAP3	0.033	FOSB	0.017	MYOM2	0.022			FAIM3	0.000
BATF2	0.011	FPR1	0.026	NACA	0.001			FAM129C	0.000
BAZ2A	0.009	FTH1	0.001	NAMPT	0.035			FAU	0.019
BCL11B	0.014	FYB	0.012	NELL2	0.034			FCER2	0.000
BCL7A	0.013	G0S2	0.029	NETO1	0.008			FCGBP	0.049
BEST1	0.017	GADD45B	0.000	NFKBIA	0.006			FCRL1	0.000
BHLHE40	0.016	GADD45G	0.037	NKG7	0.007			FCRL2	0.000
BMX	0.022	GAPDH	0.001	NOSIP	0.001			FCRL3	0.000
BPI	0.035	GATA3	0.024	NR6A1	0.037			FCRL5	0.038
BRP44L	0.034	GBP1	0.002	NT5E	0.002			FCRLA	0.002
BST1	0.039	GBP2	0.005	OASL	0.008			FMOD	0.000
BTBD11	0.011	GBP5	0.002	OAZ1	0.036			FTL	0.032
BTNL3	0.005	GIMAP4	0.005	OLFM4	0.012			GLTSCR2	0.002
C10orf54	0.039	GIMAP5	0.002	OS9	0.049			GNAS	0.007
C13orf15	0.025	GIMAP6	0.017	OSBPL5	0.001			GNB2L1	0.011
C15orf48	0.005	GIMAP7	0.013	PCBP3	0.006			GRB2	0.028
C1orf21	0.043	GIT2	0.028	PDE1B	0.047			GSTM2	0.033
C1orf228	0.016	GLIPR1	0.010	PEBP1	0.003			GTSF1L	0.041
C1orf38	0.001	GLIPR2	0.047	PER1	0.043			H1FX	0.006
C20orf24	0.047	GLUL	0.005	PFDN5	0.001			HDAC9	0.000
C5AR1	0.014	GMFG	0.005	PFN1	0.005			HLA-A	0.000
C9orf47	0.042	GNAQ	0.046	PI3	0.025			HLA-DMA	0.004
CACNG6	0.038	GNB4	0.008	PIM1	0.015			HLA-DOB	0.043
CAMP	0.017	GNLY	0.003	PIM3	0.046			HLA-DQA1	0.001
CASP1	0.049	GOLGA8A	0.030	PLAC8	0.008			HLA-DQA2	0.002
CCL2	0.016	GPAT2	0.015	PLEKHA2	0.001			HLA-DQB1	0.001
CCL3	0.007	GPR162	0.039	PLIN5	0.005			HLA-DQB2	0.002
CCL4	0.009	GPR183	0.033	PNMA2	0.001			HLA-DRB5	0.004
CCL5	0.003	GRN	0.018	PNMAL1	0.041			HLA-DRB6	0.002
CCNJL	0.001	GSDMB	0.028	PPP1R9A	0.006			HLA-E	0.004
CCR2	0.043	GTSF1	0.021	PROK2	0.027			ID3	0.006
CCR3	0.007	GZMA	0.006	PRR13	0.021			IGFBP4	0.001
CCT2	0.049	GZMB	0.024	PTGER4	0.032			IGJ	0.002
CD14	0.000	GZMH	0.004	PTGS2	0.038			IL2RG	0.043
CD160	0.029	GZMK	0.004	PTMA	0.022			IL4R	0.000
CD163	0.030	H3F3A	0.029	PTPN6	0.001			JUN	0.003
CD2	0.032	H3F3B	0.000	PXN	0.032			KCNN4	0.000
CD247	0.021	HBA2	0.036	RGS2	0.002			KIAA0040	0.034
CD27	0.007	HBB	0.010	RHOB	0.001			LAPTM5	0.000
CD28	0.020	HCK	0.043	RILPL2	0.021			LENG8	0.005
CD300LF	0.032	HEY1	0.002	RNF130	0.046			LOC401847	0.003
CD33	0.025	HIF1A	0.010	RNU12	0.017			LYZL4	0.022
CD36	0.001	HINT1	0.030	RPL11	0.002			MMP17	0.023
CD3D	0.005	HIP1R	0.002	RPL35A	0.004			MS4A1	0.006
CD3E	0.029	HIST1H1C	0.011	RPL37A	0.002			MYL9	0.002
CD3G	0.024	HIST1H1D	0.047	RPL39	0.005			NPTX1	0.046
CD63	0.007	HIST1H2BG	0.047	RPL41	0.001			NSMCE1	0.044
CD69	0.003	HIST2H2AA4	0.016	RPL6	0.011			P2RY14	0.000
CD74	0.000	HIST2H2BE	0.046	RPL8	0.043			PDGFD	0.002
CD8A	0.020	HK2	0.031	RPLP0	0.010			PELI1	0.015
CD8B	0.003	HLA-B	0.001	RPLP1	0.002			PHYHD1	0.008
CD93	0.006	HLA-C	0.008	RPLP2	0.000			PKIG	0.001
CDK6	0.017	HLA-DPA1	0.004	RPS12	0.006			PMAIP1	0.045
CDKN2D	0.004	HLA-DRA	0.001	RPS14	0.033			PNRC2	0.043
CEACAM6	0.028	HLA-DRB1	0.025	RPS2	0.035			PPAPDC1B	0.000
CEACAM8	0.033	HNRNPA1	0.015	RPS20	0.013			PPM1M	0.026
CEBPA	0.034	HOMER3	0.038	RPS24	0.006			PPP1R15A	0.002
CEBPB	0.036	HSP90AA1	0.033	RPS26	0.013			PRKCSH	0.039
CFD	0.011	HSP90B1	0.030	RPS29	0.035			PROX1	0.010
CFP	0.010	HSPA1A	0.000	RPS4Y1	0.010			PTPN1	0.015
CHI3L1	0.005	HSPA5	0.007	RPS8	0.037			PYHIN1	0.020
CHI3L2	0.007	HSPA6	0.028	RSAD2	0.011			RASGRP3	0.018
CHPT1	0.002	ICOS	0.009	RSRC2	0.046			RCSD1	0.012
CITED2	0.036	ID2	0.011	RUNX3	0.019			RHOA	0.002
CLC	0.014	IER2	0.000	S100A10	0.026			RHOBTB2	0.010
CLEC12A	0.002	IER5	0.004	S100A11	0.009			RPL13	0.028
CLEC1A	0.005	IFI30	0.004	S100A4	0.000			RPL13A	0.028
CLEC2B	0.015	IFI44	0.006	S100A6	0.000			RPL18	0.001
CLEC2D	0.017	IFI44L	0.034	S100A8	0.005			RPL27	0.009
CLEC4E	0.003	IFIT1	0.003	S1PR3	0.016			RPL28	0.011
CLEC7A	0.028	IFIT2	0.003	SAMD12	0.006			RPL29	0.024
CMKLR1	0.014	IFIT3	0.002	SAT1	0.000			RPL3	0.015
CMTM2	0.008	IFITM1	0.012	SELL	0.001			RPL30	0.000
COL18A1	0.003	IFITM2	0.005	SERINC5	0.036			RPL36	0.004
COTL1	0.001	IFITM3	0.034	SERPINA1	0.037			RPL36AL	0.003
CPVL	0.001	IL13RA1	0.030	SF1	0.030			RPL38	0.002
CR1	0.029	IL15	0.005	SFTPB	0.035			RPL5	0.043
CREB5	0.001	IL32	0.010	SGK1	0.047			RPS11	0.011
CRY1	0.019	IL5RA	0.039	SH2D1A	0.043			RPS16	0.002
CSDA	0.017	IL7R	0.033	SIDT2	0.035			RPS18	0.044
CSF1R	0.001	IL8	0.001	SIK1	0.023			RPS19	0.004
CSF3R	0.004	INPP4B	0.044	SLC25A3	0.018			RPS21	0.043
CSGALNACT1	0.014	IPCEF1	0.034	SLC2A3	0.038			RPS25	0.016
CST3	0.003	IRF8	0.001	SMAD3	0.045			RPS3	0.004
CST7	0.021	ISCU	0.021	SNHG5	0.041			RPS4X	0.000
CSTA	0.014	ISG15	0.024	SNHG8	0.016			RPS5	0.039
CSTB	0.022	ITGA4	0.008	SNORD22	0.002			RPS6	0.000
CTSD	0.019	ITGA5	0.047	SNX2	0.048			RPS9	0.010
CTSG	0.043	ITGAL	0.006	SPI1	0.024			S100A9	0.002
CTSW	0.032	ITGB2	0.021	SSH2	0.027			SESN1	0.036
CX3CR1	0.000	ITGB5	0.002	STAT6	0.034			SLAMF6	0.041
CXCL2	0.001	ITK	0.024	STRAP	0.047			SMAP2	0.028
CXCR1	0.035	ITM2B	0.033	TALDO1	0.047			SNRNP70	0.001
CXCR2	0.001	JUNB	0.001	TANC2	0.035			SNRPA	0.036
CYBA	0.016	JUND	0.000	TBC1D9	0.006			STK32B	0.001
CYBB	0.001	KCNE3	0.002	THBD	0.047			TCL1A	0.003
CYP1B1	0.013	KCNJ15	0.014	TLR8	0.046			TMSB10	0.000
CYP27A1	0.028	KCNQ1	0.011	TMEM51	0.014			TNFRSF13B	0.028
CYP4F2	0.046	KCTD12	0.008	TMSB4X	0.000			TPT1	0.004
CYP4F3	0.009	KDM5A	0.026	TNF	0.024			TRPM4	0.000
D4S234E	0.037	KIAA0125	0.004	TNFAIP2	0.015			TSTD1	0.041
DAZAP2	0.003	KIAA1257	0.027	TNFRSF12A	0.025			TXNDC5	0.028
DBI	0.003	KLF10	0.049	TNFRSF1B	0.032			UBB	0.003
DDIT3	0.002	KLF2	0.000	TPI1	0.046			UCP2	0.017
DDIT4	0.004	KLF3	0.045	TRAT1	0.037			VAMP2	0.008
DEF8	0.011	KLF4	0.014	TRIM22	0.028			VOPP1	0.004
DEFA3	0.010	KLF6	0.004	TSC22D3	0.000			XIST	0.000
DEFA4	0.007	KLRB1	0.005	TSPAN13	0.007			ZBTB32	0.011
DENND2D	0.034	KLRK1	0.022	TUBB6	0.040			ZNF595	0.002

## Sheet: SUPPLEMENTARY TABLE S5
Supplementary Table S5. Gene ontology analysis with deregulated genes of NOTCH1-M versus -WT
Up-regulated genes
GO molecular function complete	FDR	Fold Enrichment
protein binding (GO:0005515)	4.99E-17	1.26
binding (GO:0005488)	1.54E-12	1.17
immune receptor activity (GO:0140375)	9.28E-09	6.79
signaling receptor binding (GO:0005102)	1.13E-08	2.26
identical protein binding (GO:0042802)	1.44E-08	2.05
molecular_function (GO:0003674)	3.15E-08	1.09
carbohydrate binding (GO:0030246)	1.29E-07	4.50
enzyme binding (GO:0019899)	1.07E-06	1.93
structural constituent of ribosome (GO:0003735)	3.99E-06	5.24
protein-containing complex binding (GO:0044877)	2.50E-05	2.11
signaling receptor activity (GO:0038023)	5.98E-05	1.96
molecular transducer activity (GO:0060089)	6.48E-05	1.96
kinase binding (GO:0019900)	2.55E-04	2.35
protein dimerization activity (GO:0046983)	2.81E-04	2.13
structural molecule activity (GO:0005198)	6.15E-04	2.35
cytokine binding (GO:0019955)	6.85E-04	4.65
MHC protein complex binding (GO:0023023)	1.34E-03	9.78
pattern recognition receptor activity (GO:0038187)	2.12E-03	11.41
ubiquitin-like protein ligase binding (GO:0044389)	2.18E-03	3.03
protein kinase binding (GO:0019901)	2.53E-03	2.25
ubiquitin protein ligase binding (GO:0031625)	2.57E-03	3.08
protein homodimerization activity (GO:0042803)	3.91E-03	2.24
chemokine binding (GO:0019956)	4.97E-03	9.33
G protein-coupled receptor binding (GO:0001664)	5.08E-03	3.01
cytokine receptor activity (GO:0004896)	5.45E-03	4.99
RNA polymerase II-specific DNA-binding transcription factor binding (GO:0061629)	7.55E-03	2.73
C-C chemokine binding (GO:0019957)	7.72E-03	11.00
transcription factor binding (GO:0008134)	8.76E-03	2.24
chemokine receptor activity (GO:0004950)	9.93E-03	10.15
G protein-coupled chemoattractant receptor activity (GO:0001637)	1.02E-02	10.15
MHC class II protein complex binding (GO:0023026)	1.15E-02	9.78
transmembrane signaling receptor activity (GO:0004888)	1.43E-02	1.75
olfactory receptor activity (GO:0004984)	1.43E-02	< 0.01
protein folding chaperone (GO:0044183)	1.53E-02	7.16
14-3-3 protein binding (GO:0071889)	1.71E-02	8.80
cell adhesion molecule binding (GO:0050839)	1.78E-02	2.24
T cell receptor binding (GO:0042608)	2.48E-02	17.60
DNA-binding transcription factor binding (GO:0140297)	2.52E-02	2.28
E-box binding (GO:0070888)	2.78E-02	6.28
IgG binding (GO:0019864)	3.09E-02	16.00
cytokine receptor binding (GO:0005126)	3.11E-02	2.76
chemokine receptor binding (GO:0042379)	3.44E-02	5.10
opsonin receptor activity (GO:0001847)	3.73E-02	33.00
C-C chemokine receptor activity (GO:0016493)	3.73E-02	9.56
complement receptor activity (GO:0004875)	3.78E-02	14.66
transcription coregulator binding (GO:0001221)	4.66E-02	3.86
GO biological process complete	FDR	Fold Enrichment
immune system process (GO:0002376)	9.22E-42	3.24
immune response (GO:0006955)	2.73E-35	3.67
regulation of immune system process (GO:0002682)	6.78E-32	3.64
defense response (GO:0006952)	1.99E-31	3.67
regulation of cytokine production (GO:0001817)	1.61E-30	5.13
response to external stimulus (GO:0009605)	5.85E-28	2.76
response to stress (GO:0006950)	9.62E-28	2.38
response to cytokine (GO:0034097)	5.87E-27	4.57
regulation of multicellular organismal process (GO:0051239)	6.90E-26	2.55
cellular response to cytokine stimulus (GO:0071345)	1.83E-25	4.73
positive regulation of immune system process (GO:0002684)	2.90E-25	4.08
regulation of immune response (GO:0050776)	1.25E-24	4.08
positive regulation of biological process (GO:0048518)	2.06E-24	1.81
leukocyte activation (GO:0045321)	2.25E-24	5.46
response to biotic stimulus (GO:0009607)	2.26E-24	3.28
cell activation (GO:0001775)	5.24E-24	4.84
response to other organism (GO:0051707)	4.97E-23	3.27
response to external biotic stimulus (GO:0043207)	5.51E-23	3.26
positive regulation of multicellular organismal process (GO:0051240)	1.00E-22	3.16
response to stimulus (GO:0050896)	5.07E-22	1.61
biological process involved in interspecies interaction between organisms (GO:0044419)	7.05E-22	3.05
positive regulation of cytokine production (GO:0001819)	1.22E-21	5.44
cellular response to chemical stimulus (GO:0070887)	2.93E-21	2.44
defense response to other organism (GO:0098542)	3.62E-21	3.60
positive regulation of gene expression (GO:0010628)	6.81E-21	3.46
response to organic substance (GO:0010033)	1.41E-20	2.38
regulation of cell activation (GO:0050865)	6.95E-20	4.20
regulation of response to stimulus (GO:0048583)	7.06E-20	2.02
regulation of leukocyte activation (GO:0002694)	1.08E-19	4.35
cellular response to organic substance (GO:0071310)	4.89E-19	2.60
regulation of cellular process (GO:0050794)	1.03E-18	1.39
cellular response to stimulus (GO:0051716)	1.14E-18	1.68
innate immune response (GO:0045087)	3.48E-18	3.78
positive regulation of response to stimulus (GO:0048584)	3.54E-18	2.47
regulation of biological process (GO:0050789)	1.50E-17	1.36
positive regulation of immune response (GO:0050778)	1.81E-17	4.36
cell surface receptor signaling pathway (GO:0007166)	1.89E-17	2.49
positive regulation of cellular process (GO:0048522)	7.61E-17	1.72
regulation of localization (GO:0032879)	8.62E-17	2.21
positive regulation of response to external stimulus (GO:0032103)	1.11E-16	4.85
regulation of response to external stimulus (GO:0032101)	1.43E-16	3.38
negative regulation of biological process (GO:0048519)	1.57E-16	1.76
inflammatory response (GO:0006954)	8.20E-16	4.42
biological regulation (GO:0065007)	8.22E-16	1.32
regulation of defense response (GO:0031347)	1.61E-15	3.97
T cell activation (GO:0042110)	2.52E-15	6.24
regulation of cell population proliferation (GO:0042127)	3.82E-15	2.59
negative regulation of immune system process (GO:0002683)	7.17E-15	4.82
regulation of lymphocyte activation (GO:0051249)	1.96E-14	4.06
lymphocyte activation (GO:0046649)	3.61E-14	4.70
regulation of response to stress (GO:0080134)	5.11E-14	2.72
negative regulation of cellular process (GO:0048523)	6.43E-14	1.74
response to chemical (GO:0042221)	6.68E-14	1.84
hemopoiesis (GO:0030097)	7.37E-14	3.85
regulation of immune effector process (GO:0002697)	1.41E-13	4.97
positive regulation of defense response (GO:0031349)	1.41E-13	5.41
leukocyte differentiation (GO:0002521)	1.43E-13	4.97
cytokine-mediated signaling pathway (GO:0019221)	1.64E-13	4.81
regulation of multicellular organismal development (GO:2000026)	1.89E-13	2.69
regulation of hemopoiesis (GO:1903706)	1.91E-13	4.79
regulation of cell adhesion (GO:0030155)	2.14E-13	3.41
negative regulation of multicellular organismal process (GO:0051241)	2.41E-13	3.02
immune system development (GO:0002520)	3.01E-13	3.53
hematopoietic or lymphoid organ development (GO:0048534)	3.23E-13	3.63
positive regulation of macromolecule metabolic process (GO:0010604)	6.07E-13	1.89
regulation of macromolecule metabolic process (GO:0060255)	8.87E-13	1.58
signal transduction (GO:0007165)	9.94E-13	1.71
positive regulation of metabolic process (GO:0009893)	1.14E-12	1.83
regulation of cell death (GO:0010941)	1.69E-12	2.45
response to bacterium (GO:0009617)	2.99E-12	3.37
cell communication (GO:0007154)	3.93E-12	1.65
immune response-regulating signaling pathway (GO:0002764)	4.46E-12	4.41
cellular response to biotic stimulus (GO:0071216)	5.22E-12	5.98
immune effector process (GO:0002252)	5.58E-12	4.18
positive regulation of cell activation (GO:0050867)	5.99E-12	4.08
mononuclear cell differentiation (GO:1903131)	5.99E-12	5.15
regulation of programmed cell death (GO:0043067)	7.37E-12	2.49
positive regulation of leukocyte activation (GO:0002696)	7.50E-12	4.13
regulation of apoptotic process (GO:0042981)	8.02E-12	2.51
leukocyte migration (GO:0050900)	8.08E-12	5.85
T cell differentiation (GO:0030217)	8.16E-12	7.38
signaling (GO:0023052)	8.42E-12	1.64
regulation of metabolic process (GO:0019222)	9.14E-12	1.53
regulation of leukocyte mediated immunity (GO:0002703)	1.05E-11	5.78
regulation of developmental process (GO:0050793)	1.14E-11	2.07
regulation of T cell activation (GO:0050863)	1.29E-11	4.57
regulation of cell migration (GO:0030334)	1.80E-11	2.97
positive regulation of cell adhesion (GO:0045785)	2.25E-11	3.97
regulation of leukocyte cell-cell adhesion (GO:1903037)	2.61E-11	4.57
regulation of interleukin-8 production (GO:0032677)	2.78E-11	10.35
myeloid leukocyte activation (GO:0002274)	3.94E-11	7.60
regulation of leukocyte differentiation (GO:1902105)	4.55E-11	4.89
positive regulation of immune effector process (GO:0002699)	5.58E-11	5.37
regulation of cell-cell adhesion (GO:0022407)	6.14E-11	3.92
regulation of cell motility (GO:2000145)	6.80E-11	2.84
cellular process (GO:0009987)	8.33E-11	1.19
regulation of gene expression (GO:0010468)	8.40E-11	1.65
positive regulation of cell-cell adhesion (GO:0022409)	8.41E-11	4.76
lymphocyte differentiation (GO:0030098)	9.17E-11	5.25
regulation of cell differentiation (GO:0045595)	1.16E-10	2.36
regulation of locomotion (GO:0040012)	1.39E-10	2.76
positive regulation of cell death (GO:0010942)	1.81E-10	3.50
cellular response to molecule of bacterial origin (GO:0071219)	2.10E-10	5.94
response to oxygen-containing compound (GO:1901700)	2.14E-10	2.37
response to molecule of bacterial origin (GO:0002237)	2.20E-10	4.57
response to lipopolysaccharide (GO:0032496)	2.42E-10	4.70
regulation of leukocyte proliferation (GO:0070663)	3.30E-10	5.14
cellular response to lipopolysaccharide (GO:0071222)	3.97E-10	6.02
leukocyte chemotaxis (GO:0030595)	6.37E-10	6.88
positive regulation of leukocyte cell-cell adhesion (GO:1903039)	7.09E-10	4.96
positive regulation of developmental process (GO:0051094)	7.15E-10	2.44
immune response-regulating cell surface receptor signaling pathway (GO:0002768)	9.34E-10	4.44
regulation of lymphocyte proliferation (GO:0050670)	1.00E-09	5.26
response to interferon-gamma (GO:0034341)	1.01E-09	7.12
negative regulation of metabolic process (GO:0009892)	1.13E-09	1.85
response to lipid (GO:0033993)	1.13E-09	2.92
regulation of cellular component movement (GO:0051270)	1.18E-09	2.63
regulation of mononuclear cell proliferation (GO:0032944)	1.27E-09	5.20
positive regulation of cell migration (GO:0030335)	1.36E-09	3.51
regulation of response to biotic stimulus (GO:0002831)	1.39E-09	4.12
biological_process (GO:0008150)	1.70E-09	1.11
cell chemotaxis (GO:0060326)	2.19E-09	5.50
negative regulation of cytokine production (GO:0001818)	2.38E-09	4.68
regulation of inflammatory response (GO:0050727)	2.44E-09	4.13
regulation of transport (GO:0051049)	2.56E-09	2.17
activation of immune response (GO:0002253)	3.16E-09	4.09
positive regulation of cell motility (GO:2000147)	4.69E-09	3.36
immune response-activating signal transduction (GO:0002757)	6.25E-09	4.47
regulation of lymphocyte differentiation (GO:0045619)	6.25E-09	5.44
immune response-activating cell surface receptor signaling pathway (GO:0002429)	6.30E-09	4.47
negative regulation of macromolecule metabolic process (GO:0010605)	6.50E-09	1.86
negative regulation of leukocyte activation (GO:0002695)	9.18E-09	5.59
positive regulation of cellular component movement (GO:0051272)	9.32E-09	3.28
positive regulation of locomotion (GO:0040017)	1.02E-08	3.26
positive regulation of T cell activation (GO:0050870)	1.09E-08	4.85
regulation of lymphocyte mediated immunity (GO:0002706)	1.09E-08	5.82
regulation of molecular function (GO:0065009)	1.18E-08	1.79
regulation of protein metabolic process (GO:0051246)	1.18E-08	1.88
positive regulation of lymphocyte activation (GO:0051251)	1.24E-08	3.76
regulation of cellular protein metabolic process (GO:0032268)	1.29E-08	1.92
negative regulation of cell activation (GO:0050866)	1.32E-08	5.21
granulocyte activation (GO:0036230)	1.53E-08	16.50
cellular response to oxygen-containing compound (GO:1901701)	1.54E-08	2.53
leukocyte activation involved in immune response (GO:0002366)	1.55E-08	5.68
response to tumor necrosis factor (GO:0034612)	1.68E-08	5.14
regulation of interferon-gamma production (GO:0032649)	2.00E-08	7.14
cell activation involved in immune response (GO:0002263)	2.24E-08	5.56
positive regulation of response to biotic stimulus (GO:0002833)	2.82E-08	5.23
cellular response to lipid (GO:0071396)	2.95E-08	3.38
alpha-beta T cell activation (GO:0046631)	3.70E-08	8.80
positive regulation of leukocyte mediated immunity (GO:0002705)	3.89E-08	6.38
cytoplasmic translation (GO:0002181)	4.61E-08	6.74
regulation of interleukin-1 beta production (GO:0032651)	4.61E-08	7.87
cellular response to tumor necrosis factor (GO:0071356)	4.63E-08	5.33
negative regulation of gene expression (GO:0010629)	5.28E-08	2.63
neutrophil activation (GO:0042119)	5.55E-08	17.28
regulation of leukocyte chemotaxis (GO:0002688)	5.68E-08	6.63
regulation of innate immune response (GO:0045088)	7.11E-08	4.56
cellular response to interferon-gamma (GO:0071346)	7.30E-08	7.01
granulocyte chemotaxis (GO:0071621)	7.56E-08	8.28
regulation of interleukin-1 production (GO:0032652)	8.18E-08	6.95
positive regulation of programmed cell death (GO:0043068)	8.96E-08	3.23
anatomical structure development (GO:0048856)	8.98E-08	1.53
regulation of leukocyte migration (GO:0002685)	1.22E-07	4.80
regulation of catalytic activity (GO:0050790)	1.49E-07	1.86
multicellular organism development (GO:0007275)	1.50E-07	1.60
positive regulation of interleukin-8 production (GO:0032757)	1.54E-07	9.62
positive regulation of apoptotic process (GO:0043065)	1.57E-07	3.22
T cell differentiation in thymus (GO:0033077)	1.77E-07	10.79
regulation of T cell differentiation (GO:0045580)	2.28E-07	5.34
regulation of viral life cycle (GO:1903900)	2.29E-07	6.01
regulation of adaptive immune response (GO:0002819)	2.30E-07	5.07
response to virus (GO:0009615)	2.45E-07	3.74
myeloid leukocyte migration (GO:0097529)	2.82E-07	6.34
system development (GO:0048731)	2.91E-07	1.63
cell death (GO:0008219)	2.91E-07	2.46
regulation of adaptive immune response based on somatic recombination of immune receptors built from immunoglobulin superfamily domains (GO:0002822)	2.92E-07	5.25
positive regulation of transport (GO:0051050)	2.99E-07	2.51
positive regulation of inflammatory response (GO:0050729)	3.00E-07	5.89
response to organic cyclic compound (GO:0014070)	3.22E-07	2.59
leukocyte cell-cell adhesion (GO:0007159)	3.53E-07	10.03
regulation of viral process (GO:0050792)	3.61E-07	5.47
developmental process (GO:0032502)	3.81E-07	1.47
negative regulation of response to stimulus (GO:0048585)	3.83E-07	2.06
granulocyte migration (GO:0097530)	4.05E-07	7.18
regulation of leukocyte mediated cytotoxicity (GO:0001910)	4.81E-07	7.76
negative regulation of cell population proliferation (GO:0008285)	5.21E-07	2.72
regulation of cell killing (GO:0031341)	5.85E-07	6.97
regulation of tumor necrosis factor superfamily cytokine production (GO:1903555)	6.12E-07	5.27
response to abiotic stimulus (GO:0009628)	6.64E-07	2.31
regulation of chemotaxis (GO:0050920)	6.65E-07	4.52
positive regulation of interleukin-1 beta production (GO:0032731)	6.77E-07	9.38
regulation of mononuclear cell migration (GO:0071675)	7.75E-07	6.28
regulation of biological quality (GO:0065008)	8.74E-07	1.60
positive regulation of cell differentiation (GO:0045597)	9.76E-07	2.50
programmed cell death (GO:0012501)	1.15E-06	2.41
regulation of cell communication (GO:0010646)	1.19E-06	1.65
positive regulation of cell killing (GO:0031343)	1.28E-06	8.80
positive regulation of hemopoiesis (GO:1903708)	1.29E-06	5.00
positive regulation of leukocyte differentiation (GO:1902107)	1.30E-06	5.00
neutrophil chemotaxis (GO:0030593)	1.37E-06	7.80
cellular response to organic cyclic compound (GO:0071407)	1.43E-06	3.04
mononuclear cell migration (GO:0071674)	1.43E-06	6.46
positive regulation of nitric oxide biosynthetic process (GO:0045429)	1.46E-06	11.52
defense response to bacterium (GO:0042742)	1.53E-06	3.50
regulation of cellular metabolic process (GO:0031323)	1.54E-06	1.42
regulation of tumor necrosis factor production (GO:0032680)	1.80E-06	5.16
negative regulation of molecular function (GO:0044092)	1.85E-06	2.24
positive regulation of cell population proliferation (GO:0008284)	1.88E-06	2.39
positive regulation of leukocyte migration (GO:0002687)	1.89E-06	5.46
chemotaxis (GO:0006935)	1.90E-06	3.00
positive regulation of leukocyte chemotaxis (GO:0002690)	2.05E-06	6.80
taxis (GO:0042330)	2.06E-06	2.99
positive regulation of nitric oxide metabolic process (GO:1904407)	2.10E-06	11.00
regulation of signaling (GO:0023051)	2.44E-06	1.63
regulation of interleukin-6 production (GO:0032675)	2.94E-06	5.28
regulation of nitric oxide biosynthetic process (GO:0045428)	2.99E-06	9.10
positive regulation of leukocyte mediated cytotoxicity (GO:0001912)	3.00E-06	9.10
regulation of signal transduction (GO:0009966)	3.23E-06	1.67
apoptotic process (GO:0006915)	3.63E-06	2.39
humoral immune response (GO:0006959)	3.76E-06	3.52
positive regulation of interleukin-1 production (GO:0032732)	3.83E-06	7.83
cell migration (GO:0016477)	3.94E-06	2.42
neutrophil migration (GO:1990266)	4.66E-06	6.92
regulation of nitrogen compound metabolic process (GO:0051171)	4.73E-06	1.42
cell adhesion (GO:0007155)	4.92E-06	2.33
response to chemokine (GO:1990868)	5.17E-06	6.84
regulation of intracellular signal transduction (GO:1902531)	5.19E-06	1.94
cellular response to chemokine (GO:1990869)	5.19E-06	6.84
lymphocyte activation involved in immune response (GO:0002285)	5.20E-06	5.77
positive regulation of innate immune response (GO:0045089)	5.65E-06	5.01
positive regulation of cellular metabolic process (GO:0031325)	5.94E-06	1.61
regulation of myeloid cell differentiation (GO:0045637)	6.10E-06	4.47
negative regulation of lymphocyte activation (GO:0051250)	6.11E-06	4.98
regulation of nitric oxide metabolic process (GO:0080164)	6.16E-06	8.38
positive regulation of interferon-gamma production (GO:0032729)	7.14E-06	7.33
regulation of interleukin-2 production (GO:0032663)	7.14E-06	8.25
myeloid cell differentiation (GO:0030099)	7.69E-06	4.02
positive regulation of chemotaxis (GO:0050921)	7.85E-06	5.19
defense response to Gram-positive bacterium (GO:0050830)	8.04E-06	6.00
cellular defense response (GO:0006968)	8.18E-06	9.31
cellular developmental process (GO:0048869)	8.66E-06	1.59
negative regulation of viral process (GO:0048525)	8.87E-06	6.48
negative regulation of immune response (GO:0050777)	1.04E-05	4.52
cell differentiation (GO:0030154)	1.11E-05	1.58
locomotion (GO:0040011)	1.12E-05	2.09
cell motility (GO:0048870)	1.26E-05	2.22
localization of cell (GO:0051674)	1.27E-05	2.22
defense response to fungus (GO:0050832)	1.30E-05	8.80
regulation of production of molecular mediator of immune response (GO:0002700)	1.31E-05	4.69
T cell selection (GO:0045058)	1.38E-05	10.23
cell-cell adhesion (GO:0098609)	1.51E-05	2.77
regulation of cytokine production involved in immune response (GO:0002718)	1.51E-05	6.16
positive regulation of nitrogen compound metabolic process (GO:0051173)	1.61E-05	1.61
response to wounding (GO:0009611)	1.69E-05	2.99
positive regulation of cell communication (GO:0010647)	1.75E-05	1.90
regulation of phagocytosis (GO:0050764)	1.84E-05	6.04
antigen processing and presentation of peptide or polysaccharide antigen via MHC class II (GO:0002504)	2.14E-05	11.65
T cell receptor signaling pathway (GO:0050852)	2.27E-05	5.45
regulation of biological process involved in symbiotic interaction (GO:0043903)	2.69E-05	8.07
regulation of T cell proliferation (GO:0042129)	2.74E-05	4.42
regulation of angiogenesis (GO:0045765)	2.76E-05	3.55
positive regulation of leukocyte proliferation (GO:0070665)	2.80E-05	4.67
positive regulation of signaling (GO:0023056)	2.92E-05	1.87
negative regulation of apoptotic process (GO:0043066)	3.11E-05	2.28
regulation of vasculature development (GO:1901342)	3.41E-05	3.50
regulation of primary metabolic process (GO:0080090)	3.56E-05	1.38
lipopolysaccharide-mediated signaling pathway (GO:0031663)	3.79E-05	10.70
negative regulation of programmed cell death (GO:0043069)	4.46E-05	2.24
negative regulation of response to external stimulus (GO:0032102)	4.64E-05	3.05
positive regulation of signal transduction (GO:0009967)	5.03E-05	1.90
negative regulation of cellular metabolic process (GO:0031324)	5.04E-05	1.66
negative regulation of immune effector process (GO:0002698)	5.31E-05	5.45
regulation of protein modification process (GO:0031399)	5.84E-05	1.89
response to fungus (GO:0009620)	5.84E-05	7.33
chemokine-mediated signaling pathway (GO:0070098)	5.85E-05	6.52
regulation of calcium-mediated signaling (GO:0050848)	5.88E-05	6.52
positive regulation of molecular function (GO:0044093)	6.39E-05	1.88
thymic T cell selection (GO:0045061)	6.54E-05	16.21
positive regulation of lymphocyte mediated immunity (GO:0002708)	6.87E-05	5.31
negative regulation of defense response (GO:0031348)	7.65E-05	3.71
antigen processing and presentation of exogenous peptide antigen via MHC class II (GO:0019886)	8.46E-05	11.73
macrophage activation (GO:0042116)	8.81E-05	8.00
antigen processing and presentation of exogenous peptide antigen (GO:0002478)	8.84E-05	8.00
myeloid leukocyte differentiation (GO:0002573)	8.90E-05	5.18
T cell activation involved in immune response (GO:0002286)	9.48E-05	6.91
negative regulation of cell adhesion (GO:0007162)	9.91E-05	3.37
regulation of DNA-binding transcription factor activity (GO:0051090)	9.99E-05	2.84
integrated stress response signaling (GO:0140467)	1.02E-04	11.35
positive regulation of biosynthetic process (GO:0009891)	1.03E-04	1.73
response to endogenous stimulus (GO:0009719)	1.03E-04	1.94
regulation of viral genome replication (GO:0045069)	1.08E-04	6.07
positive regulation of intracellular signal transduction (GO:1902533)	1.10E-04	2.14
positive regulation of tumor necrosis factor superfamily cytokine production (GO:1903557)	1.11E-04	5.50
negative regulation of viral genome replication (GO:0045071)	1.13E-04	7.72
adaptive immune response (GO:0002250)	1.15E-04	2.43
response to interleukin-1 (GO:0070555)	1.15E-04	4.68
regulation of T cell mediated immunity (GO:0002709)	1.18E-04	6.00
antigen processing and presentation of peptide antigen via MHC class II (GO:0002495)	1.21E-04	11.00
response to corticosteroid (GO:0031960)	1.28E-04	4.35
positive regulation of phagocytosis (GO:0050766)	1.30E-04	6.63
positive regulation of vasculature development (GO:1904018)	1.36E-04	4.32
negative regulation of cell death (GO:0060548)	1.37E-04	2.10
positive regulation of angiogenesis (GO:0045766)	1.37E-04	4.32
regulation of alpha-beta T cell activation (GO:0046634)	1.41E-04	5.35
positive regulation of lymphocyte proliferation (GO:0050671)	1.42E-04	4.58
positive regulation of protein metabolic process (GO:0051247)	1.44E-04	1.86
positive regulation of lymphocyte differentiation (GO:0045621)	1.52E-04	4.89
regulation of erythrocyte differentiation (GO:0045646)	1.59E-04	8.61
lymphocyte migration (GO:0072676)	1.60E-04	6.45
positive regulation of mononuclear cell proliferation (GO:0032946)	1.63E-04	4.52
response to interferon-alpha (GO:0035455)	1.68E-04	13.39
positive regulation of cellular biosynthetic process (GO:0031328)	1.70E-04	1.72
cellular response to endogenous stimulus (GO:0071495)	1.70E-04	2.04
regulation of ERK1 and ERK2 cascade (GO:0070372)	1.77E-04	3.23
positive regulation of cellular protein metabolic process (GO:0032270)	1.81E-04	1.89
negative regulation of cell motility (GO:2000146)	1.85E-04	3.22
negative regulation of developmental process (GO:0051093)	1.88E-04	2.16
response to organophosphorus (GO:0046683)	2.05E-04	4.74
positive regulation of T cell differentiation (GO:0045582)	2.32E-04	5.06
regulation of interleukin-12 production (GO:0032655)	2.32E-04	6.98
positive regulation of ERK1 and ERK2 cascade (GO:0070374)	2.34E-04	3.70
response to growth factor (GO:0070848)	2.57E-04	2.62
regulation of lymphocyte migration (GO:2000401)	2.59E-04	6.87
regulation of transcription from RNA polymerase II promoter in response to stress (GO:0043618)	2.59E-04	6.87
negative regulation of cellular component movement (GO:0051271)	2.66E-04	3.13
regulation of granulocyte chemotaxis (GO:0071622)	2.75E-04	7.92
negative regulation of cell migration (GO:0030336)	2.77E-04	3.23
regulation of natural killer cell chemotaxis (GO:2000501)	2.80E-04	27.50
negative regulation of nitrogen compound metabolic process (GO:0051172)	2.85E-04	1.63
negative regulation of locomotion (GO:0040013)	2.95E-04	3.01
negative regulation of leukocyte cell-cell adhesion (GO:1903038)	2.95E-04	4.56
antigen processing and presentation of exogenous antigen (GO:0019884)	3.22E-04	6.67
regulation of neuron death (GO:1901214)	3.30E-04	3.08
negative regulation of catalytic activity (GO:0043086)	3.41E-04	2.23
positive regulation of tumor necrosis factor production (GO:0032760)	3.47E-04	5.28
modulation by symbiont of entry into host (GO:0052372)	3.54E-04	7.61
negative regulation of leukocyte mediated immunity (GO:0002704)	3.58E-04	6.57
animal organ development (GO:0048513)	3.60E-04	1.52
negative regulation of interleukin-2 production (GO:0032703)	3.77E-04	11.41
cell killing (GO:0001906)	3.97E-04	4.77
receptor internalization (GO:0031623)	3.98E-04	6.47
positive regulation of catalytic activity (GO:0043085)	4.05E-04	1.94
positive regulation of mononuclear cell migration (GO:0071677)	4.44E-04	6.38
regulation of metal ion transport (GO:0010959)	4.59E-04	2.76
regulation of MAPK cascade (GO:0043408)	4.71E-04	2.30
regulation of epithelial cell migration (GO:0010632)	4.86E-04	3.47
defense response to virus (GO:0051607)	4.87E-04	3.33
regulation of DNA-templated transcription in response to stress (GO:0043620)	4.90E-04	6.28
defense response to symbiont (GO:0140546)	5.07E-04	3.32
positive regulation of calcium-mediated signaling (GO:0050850)	5.08E-04	8.58
multicellular organismal process (GO:0032501)	5.09E-04	1.31
maintenance of location (GO:0051235)	5.25E-04	4.02
negative regulation of T cell activation (GO:0050868)	5.29E-04	4.61
positive regulation of chemokine production (GO:0032722)	5.38E-04	6.20
microglial cell activation (GO:0001774)	5.39E-04	10.62
translation (GO:0006412)	5.42E-04	2.80
response to purine-containing compound (GO:0014074)	5.76E-04	4.25
cellular extravasation (GO:0045123)	5.78E-04	8.38
response to mechanical stimulus (GO:0009612)	6.09E-04	3.56
negative regulation of interleukin-8 production (GO:0032717)	6.25E-04	13.89
T cell migration (GO:0072678)	6.37E-04	10.27
positive T cell selection (GO:0043368)	6.39E-04	10.27
positive regulation of neuron death (GO:1901216)	6.56E-04	5.38
regulation of ion transport (GO:0043269)	6.84E-04	2.24
regulation of endothelial cell migration (GO:0010594)	7.04E-04	3.90
antibacterial humoral response (GO:0019731)	7.08E-04	6.83
regulation of vesicle-mediated transport (GO:0060627)	7.09E-04	2.43
regulation of lymphocyte apoptotic process (GO:0070228)	7.10E-04	6.83
regulation of anatomical structure morphogenesis (GO:0022603)	7.30E-04	2.04
regulation of superoxide metabolic process (GO:0090322)	7.50E-04	9.93
negative regulation of cell-cell adhesion (GO:0022408)	7.54E-04	3.67
response to cAMP (GO:0051591)	7.73E-04	5.26
antigen receptor-mediated signaling pathway (GO:0050851)	7.76E-04	3.33
alpha-beta T cell differentiation (GO:0046632)	7.87E-04	6.71
positive thymic T cell selection (GO:0045059)	7.87E-04	20.00
positive regulation of adaptive immune response based on somatic recombination of immune receptors built from immunoglobulin superfamily domains (GO:0002824)	8.05E-04	4.76
antigen processing and presentation (GO:0019882)	8.07E-04	4.76
regulation of protein phosphorylation (GO:0001932)	8.09E-04	1.95
regulation of epithelial cell proliferation (GO:0050678)	8.15E-04	2.87
movement of cell or subcellular component (GO:0006928)	8.37E-04	1.78
regulation of viral entry into host cell (GO:0046596)	8.46E-04	7.82
amide biosynthetic process (GO:0043604)	8.50E-04	2.45
antigen processing and presentation of peptide antigen (GO:0048002)	8.51E-04	5.79
regulation of myeloid leukocyte mediated immunity (GO:0002886)	8.56E-04	6.60
regulation of type 2 immune response (GO:0002828)	8.58E-04	9.62
regulation of interleukin-4 production (GO:0032673)	8.60E-04	9.62
leukocyte activation involved in inflammatory response (GO:0002269)	8.62E-04	9.62
mucosal immune response (GO:0002385)	8.64E-04	9.62
regulation of hydrolase activity (GO:0051336)	8.96E-04	1.98
circadian rhythm (GO:0007623)	9.46E-04	4.30
positive regulation of miRNA transcription (GO:1902895)	9.47E-04	7.65
regulation of fat cell differentiation (GO:0045598)	9.49E-04	4.30
regulation of chemokine production (GO:0032642)	9.61E-04	5.09
cellular response to interleukin-1 (GO:0071347)	9.85E-04	4.63
positive regulation of interleukin-6 production (GO:0032755)	1.04E-03	5.04
cellular response to chemical stress (GO:0062197)	1.05E-03	3.11
regulation of secretion (GO:0051046)	1.10E-03	2.30
leukocyte mediated immunity (GO:0002443)	1.12E-03	2.98
protein refolding (GO:0042026)	1.13E-03	12.00
positive regulation of adaptive immune response (GO:0002821)	1.14E-03	4.55
detection of chemical stimulus involved in sensory perception (GO:0050907)	1.17E-03	< 0.01
positive regulation of myeloid cell differentiation (GO:0045639)	1.22E-03	4.94
response to organonitrogen compound (GO:0010243)	1.30E-03	1.99
glial cell activation (GO:0061900)	1.36E-03	8.80
peptide biosynthetic process (GO:0043043)	1.37E-03	2.61
lymphocyte chemotaxis (GO:0048247)	1.37E-03	7.18
negative regulation of transport (GO:0051051)	1.41E-03	2.55
response to steroid hormone (GO:0048545)	1.48E-03	3.02
response to glucocorticoid (GO:0051384)	1.48E-03	4.09
regulation of myeloid leukocyte differentiation (GO:0002761)	1.51E-03	4.40
receptor-mediated endocytosis (GO:0006898)	1.56E-03	3.80
organ or tissue specific immune response (GO:0002251)	1.56E-03	8.55
regulation of T cell apoptotic process (GO:0070232)	1.56E-03	8.55
antimicrobial humoral immune response mediated by antimicrobial peptide (GO:0061844)	1.66E-03	4.74
regulation of neuron apoptotic process (GO:0043523)	1.67E-03	3.38
antimicrobial humoral response (GO:0019730)	1.67E-03	4.03
cellular response to stress (GO:0033554)	1.71E-03	1.73
positive regulation of production of molecular mediator of immune response (GO:0002702)	1.71E-03	4.33
regulation of actin cytoskeleton organization (GO:0032956)	1.74E-03	2.70
negative regulation of hydrolase activity (GO:0051346)	1.88E-03	2.69
defense response to protozoan (GO:0042832)	1.99E-03	10.56
negative regulation of lymphocyte proliferation (GO:0050672)	2.02E-03	5.12
regulation of T cell cytokine production (GO:0002724)	2.05E-03	8.10
positive regulation of lymphocyte migration (GO:2000403)	2.06E-03	8.10
neuroinflammatory response (GO:0150076)	2.06E-03	8.10
circadian regulation of gene expression (GO:0032922)	2.10E-03	5.74
regulation of phosphorylation (GO:0042325)	2.13E-03	1.82
regulation of transferase activity (GO:0051338)	2.14E-03	1.99
negative regulation of mononuclear cell proliferation (GO:0032945)	2.17E-03	5.06
regulation of leukocyte apoptotic process (GO:2000106)	2.17E-03	5.06
regulation of cold-induced thermogenesis (GO:0120161)	2.24E-03	3.89
regulation of phosphate metabolic process (GO:0019220)	2.28E-03	1.76
positive regulation of cytokine production involved in immune response (GO:0002720)	2.29E-03	5.66
positive regulation of transcription from RNA polymerase II promoter in response to stress (GO:0036003)	2.30E-03	10.15
antigen processing and presentation of endogenous antigen (GO:0019883)	2.30E-03	10.15
regulation of phosphorus metabolic process (GO:0051174)	2.31E-03	1.76
regulation of lymphocyte chemotaxis (GO:1901623)	2.31E-03	10.15
positive regulation of macrophage migration (GO:1905523)	2.31E-03	10.15
negative regulation of transcription by RNA polymerase II (GO:0000122)	2.32E-03	1.95
response to protozoan (GO:0001562)	2.32E-03	10.15
regulation of cell-substrate adhesion (GO:0010810)	2.39E-03	3.26
regulation of B cell activation (GO:0050864)	2.51E-03	3.24
regulation of cellular macromolecule biosynthetic process (GO:2000112)	2.56E-03	2.32
tube development (GO:0035295)	2.58E-03	1.99
response to radiation (GO:0009314)	2.58E-03	2.51
response to nitrogen compound (GO:1901698)	2.65E-03	1.89
rhythmic process (GO:0048511)	2.65E-03	2.97
blood vessel development (GO:0001568)	2.70E-03	2.34
positive regulation of myeloid leukocyte differentiation (GO:0002763)	2.90E-03	6.28
negative regulation of inflammatory response (GO:0050728)	2.94E-03	3.76
T cell costimulation (GO:0031295)	2.96E-03	7.51
tissue development (GO:0009888)	2.97E-03	1.67
negative regulation of viral life cycle (GO:1903901)	3.19E-03	9.43
lymphocyte mediated immunity (GO:0002449)	3.39E-03	3.02
negative regulation of leukocyte proliferation (GO:0070664)	3.42E-03	4.73
negative regulation of signal transduction (GO:0009968)	3.43E-03	1.77
gamma-delta T cell activation (GO:0046629)	3.48E-03	12.94
regulation of chemokine (C-X-C motif) ligand 2 production (GO:2000341)	3.49E-03	12.94
sensory perception of pain (GO:0019233)	3.51E-03	5.28
regulation of interleukin-10 production (GO:0032653)	3.52E-03	6.07
detection of chemical stimulus involved in sensory perception of smell (GO:0050911)	3.52E-03	< 0.01
blood vessel morphogenesis (GO:0048514)	3.59E-03	2.51
regulation of actin filament organization (GO:0110053)	3.63E-03	2.88
Fc-gamma receptor signaling pathway (GO:0038094)	3.69E-03	9.10
lymphocyte costimulation (GO:0031294)	3.75E-03	7.16
monocyte chemotaxis (GO:0002548)	3.76E-03	7.16
positive regulation of macromolecule biosynthetic process (GO:0010557)	3.79E-03	1.60
negative regulation of protein metabolic process (GO:0051248)	3.92E-03	1.86
localization (GO:0051179)	4.21E-03	1.32
dendritic cell chemotaxis (GO:0002407)	4.26E-03	12.22
natural killer cell mediated cytotoxicity (GO:0042267)	4.27E-03	8.80
regulation of B cell differentiation (GO:0045577)	4.28E-03	8.80
intracellular signal transduction (GO:0035556)	4.51E-03	1.70
regulation of neutrophil migration (GO:1902622)	4.74E-03	6.84
granzyme-mediated programmed cell death signaling pathway (GO:0140507)	4.82E-03	19.55
wound healing (GO:0042060)	4.84E-03	2.63
regulation of biosynthetic process (GO:0009889)	5.00E-03	1.37
regulation of miRNA transcription (GO:1902893)	5.16E-03	5.68
antigen processing and presentation of endogenous peptide antigen (GO:0002483)	5.17E-03	11.58
pattern recognition receptor signaling pathway (GO:0002221)	5.19E-03	4.44
response to inorganic substance (GO:0010035)	5.26E-03	2.28
cellular response to external stimulus (GO:0071496)	5.47E-03	2.68
regulation of reactive oxygen species metabolic process (GO:2000377)	5.65E-03	3.72
regulation of neutrophil chemotaxis (GO:0090022)	5.66E-03	8.25
natural killer cell mediated immunity (GO:0002228)	5.67E-03	8.25
regulation of cellular biosynthetic process (GO:0031326)	5.76E-03	1.36
regulation of peptidase activity (GO:0052547)	5.86E-03	2.36
vasculature development (GO:0001944)	5.87E-03	2.24
cellular response to corticosteroid stimulus (GO:0071384)	6.15E-03	5.50
positive regulation of myeloid leukocyte mediated immunity (GO:0002888)	6.18E-03	11.00
positive regulation of MAPK cascade (GO:0043410)	6.19E-03	2.29
positive regulation of superoxide anion generation (GO:0032930)	6.19E-03	11.00
regulation of endopeptidase activity (GO:0052548)	6.35E-03	2.41
chronic inflammatory response (GO:0002544)	6.37E-03	17.60
regulation of vascular endothelial growth factor production (GO:0010574)	6.39E-03	8.00
negative regulation of lymphocyte apoptotic process (GO:0070229)	6.41E-03	8.00
regulation of regulatory T cell differentiation (GO:0045589)	6.42E-03	8.00
positive regulation of neutrophil migration (GO:1902624)	6.43E-03	8.00
response to interleukin-8 (GO:0098758)	6.45E-03	43.99
regulation of epithelial cell apoptotic process (GO:1904035)	6.46E-03	4.77
CD4-positive, alpha-beta T cell activation (GO:0035710)	6.46E-03	6.42
cellular response to interleukin-8 (GO:0098759)	6.47E-03	43.99
response to alcohol (GO:0097305)	6.54E-03	2.93
regulation of B cell proliferation (GO:0030888)	6.56E-03	5.41
positive regulation of fat cell differentiation (GO:0045600)	6.58E-03	5.41
negative regulation of leukocyte differentiation (GO:1902106)	6.63E-03	4.27
protein stabilization (GO:0050821)	7.05E-03	3.04
cellular response to growth factor stimulus (GO:0071363)	7.10E-03	2.31
entrainment of circadian clock (GO:0009649)	7.22E-03	7.76
negative regulation of T cell apoptotic process (GO:0070233)	7.25E-03	10.47
negative regulation of signaling (GO:0023057)	7.52E-03	1.70
negative regulation of hemopoiesis (GO:1903707)	7.57E-03	4.19
positive regulation of protein-containing complex assembly (GO:0031334)	7.77E-03	3.16
regulation of CD4-positive, alpha-beta T cell activation (GO:2000514)	7.77E-03	5.25
positive regulation of cytosolic calcium ion concentration (GO:0007204)	7.79E-03	3.16
regulation of leukocyte degranulation (GO:0043300)	7.80E-03	6.16
negative regulation of cellular protein metabolic process (GO:0032269)	7.82E-03	1.86
negative regulation of G protein-coupled receptor signaling pathway (GO:0045744)	7.82E-03	6.16
positive regulation of cell-substrate adhesion (GO:0010811)	7.96E-03	3.81
embryonic placenta development (GO:0001892)	7.97E-03	4.60
negative thymic T cell selection (GO:0045060)	8.09E-03	16.00
regulation of neuroinflammatory response (GO:0150077)	8.10E-03	7.54
negative regulation of endopeptidase activity (GO:0010951)	8.17E-03	2.86
angiogenesis (GO:0001525)	8.19E-03	2.57
regulation of actin filament-based process (GO:0032970)	8.20E-03	2.43
positive regulation of alpha-beta T cell activation (GO:0046635)	8.33E-03	5.18
regulation of alpha-beta T cell differentiation (GO:0046637)	8.35E-03	5.18
response to decreased oxygen levels (GO:0036293)	8.40E-03	2.65
leukocyte mediated cytotoxicity (GO:0001909)	8.52E-03	6.04
negative regulation of DNA-binding transcription factor activity (GO:0043433)	8.68E-03	3.29
response to transforming growth factor beta (GO:0071559)	8.71E-03	3.50
positive regulation of smooth muscle cell migration (GO:0014911)	9.08E-03	7.33
astrocyte development (GO:0014002)	9.10E-03	7.33
positive regulation of neuron apoptotic process (GO:0043525)	9.40E-03	5.92
apoptotic signaling pathway (GO:0097190)	9.47E-03	2.71
phagocytosis (GO:0006909)	9.84E-03	2.80
amyloid-beta clearance (GO:0097242)	9.85E-03	9.56
cytolysis (GO:0019835)	9.87E-03	9.56
leukocyte adhesion to vascular endothelial cell (GO:0061756)	9.89E-03	9.56
innate immune response in mucosa (GO:0002227)	9.90E-03	9.56
negative regulation of macromolecule biosynthetic process (GO:0010558)	9.91E-03	1.65
regulation of superoxide anion generation (GO:0032928)	9.92E-03	9.56
regulation of protein-containing complex assembly (GO:0043254)	1.00E-02	2.36
negative regulation of cell communication (GO:0010648)	1.01E-02	1.68
'de novo' post-translational protein folding (GO:0051084)	1.01E-02	7.13
positive regulation of transcription from RNA polymerase II promoter in response to endoplasmic reticulum stress (GO:1990440)	1.01E-02	14.66
negative T cell selection (GO:0043383)	1.01E-02	14.66
microglial cell activation involved in immune response (GO:0002282)	1.01E-02	33.00
T cell differentiation involved in immune response (GO:0002292)	1.02E-02	7.13
negative regulation of NF-kappaB transcription factor activity (GO:0032088)	1.03E-02	4.40
regulation of blood vessel endothelial cell migration (GO:0043535)	1.10E-02	4.35
negative regulation of peptidase activity (GO:0010466)	1.12E-02	2.76
negative regulation of lymphocyte differentiation (GO:0045620)	1.12E-02	5.70
cellular response to glucocorticoid stimulus (GO:0071385)	1.12E-02	5.70
regulation of cellular extravasation (GO:0002691)	1.13E-02	6.95
positive regulation of neutrophil chemotaxis (GO:0090023)	1.14E-02	9.17
negative regulation of viral entry into host cell (GO:0046597)	1.14E-02	9.17
positive regulation of nucleobase-containing compound metabolic process (GO:0045935)	1.17E-02	1.54
negative regulation of lymphocyte mediated immunity (GO:0002707)	1.22E-02	5.60
negative regulation of cellular biosynthetic process (GO:0031327)	1.23E-02	1.61
regulation of macromolecule biosynthetic process (GO:0010556)	1.25E-02	1.35
maintenance of location in cell (GO:0051651)	1.25E-02	4.26
complement receptor mediated signaling pathway (GO:0002430)	1.26E-02	13.54
response to toxic substance (GO:0009636)	1.29E-02	2.83
response to hypoxia (GO:0001666)	1.31E-02	2.62
positive regulation of DNA biosynthetic process (GO:2000573)	1.31E-02	4.76
positive regulation of interleukin-4 production (GO:0032753)	1.31E-02	8.80
dendritic cell migration (GO:0036336)	1.31E-02	8.80
cellular response to cAMP (GO:0071320)	1.32E-02	5.50
myeloid cell activation involved in immune response (GO:0002275)	1.33E-02	5.50
regulation of response to wounding (GO:1903034)	1.39E-02	3.28
cellular nitrogen compound biosynthetic process (GO:0044271)	1.45E-02	1.66
positive regulation of protein modification process (GO:0031401)	1.45E-02	1.78
negative regulation of cell differentiation (GO:0045596)	1.45E-02	1.99
negative regulation of intracellular signal transduction (GO:1902532)	1.45E-02	2.14
regulation of response to cytokine stimulus (GO:0060759)	1.45E-02	3.26
positive regulation of cell-matrix adhesion (GO:0001954)	1.45E-02	5.40
cellular response to organonitrogen compound (GO:0071417)	1.46E-02	2.09
negative regulation of T cell receptor signaling pathway (GO:0050860)	1.51E-02	8.46
regulation of microglial cell mediated cytotoxicity (GO:1904149)	1.51E-02	26.40
circulatory system development (GO:0072359)	1.52E-02	1.83
tube morphogenesis (GO:0035239)	1.52E-02	1.98
negative regulation of type 2 immune response (GO:0002829)	1.53E-02	12.57
'de novo' protein folding (GO:0006458)	1.54E-02	6.44
negative regulation of interferon-gamma production (GO:0032689)	1.54E-02	6.44
regulation of macrophage migration (GO:1905521)	1.54E-02	6.44
regulation of glial cell migration (GO:1903975)	1.54E-02	12.57
T cell chemotaxis (GO:0010818)	1.54E-02	12.57
cellular biosynthetic process (GO:0044249)	1.55E-02	1.48
actin filament bundle assembly (GO:0051017)	1.55E-02	5.31
regulation of macrophage activation (GO:0043030)	1.55E-02	5.31
endoderm development (GO:0007492)	1.59E-02	4.57
cellular response to nitrogen compound (GO:1901699)	1.69E-02	2.02
positive regulation of cold-induced thermogenesis (GO:0120162)	1.69E-02	4.04
regulation of p38MAPK cascade (GO:1900744)	1.70E-02	6.28
positive regulation of granulocyte chemotaxis (GO:0071624)	1.70E-02	8.15
macrophage differentiation (GO:0030225)	1.70E-02	8.15
peptide metabolic process (GO:0006518)	1.74E-02	2.13
negative regulation of biosynthetic process (GO:0009890)	1.77E-02	1.58
integrin-mediated signaling pathway (GO:0007229)	1.78E-02	4.00
homeostasis of number of cells (GO:0048872)	1.82E-02	2.72
regulation of blood pressure (GO:0008217)	1.82E-02	2.98
myeloid cell homeostasis (GO:0002262)	1.82E-02	3.64
activation of innate immune response (GO:0002218)	1.82E-02	4.46
cellular amide metabolic process (GO:0043603)	1.83E-02	1.86
negative regulation of smooth muscle contraction (GO:0045986)	1.83E-02	11.73
cellular response to transforming growth factor beta stimulus (GO:0071560)	1.84E-02	3.36
regulation of neutrophil activation (GO:1902563)	1.84E-02	11.73
positive regulation of protein phosphorylation (GO:0001934)	1.85E-02	1.90
response to reactive oxygen species (GO:0000302)	1.85E-02	3.14
regulation of cell-matrix adhesion (GO:0001952)	1.90E-02	3.61
regulation of cell development (GO:0060284)	1.91E-02	2.13
negative regulation of nucleobase-containing compound metabolic process (GO:0045934)	1.96E-02	1.59
actin filament bundle organization (GO:0061572)	1.96E-02	5.05
regulation of natural killer cell activation (GO:0032814)	2.05E-02	6.00
apoptotic cell clearance (GO:0043277)	2.05E-02	6.00
response to bacterial lipopeptide (GO:0070339)	2.07E-02	22.00
cellular response to bacterial lipopeptide (GO:0071221)	2.08E-02	22.00
cellular response to bacterial lipoprotein (GO:0071220)	2.08E-02	22.00
regulation of fibroblast growth factor production (GO:0090270)	2.08E-02	22.00
negative regulation of transcription, DNA-templated (GO:0045892)	2.09E-02	1.64
negative regulation of nucleic acid-templated transcription (GO:1903507)	2.09E-02	1.64
regulation of supramolecular fiber organization (GO:1902903)	2.09E-02	2.30
female pregnancy (GO:0007565)	2.09E-02	3.09
positive regulation of toll-like receptor 2 signaling pathway (GO:0034137)	2.09E-02	22.00
positive regulation of natural killer cell chemotaxis (GO:2000503)	2.09E-02	22.00
actin filament-based process (GO:0030029)	2.12E-02	2.02
positive regulation of vascular endothelial growth factor production (GO:0010575)	2.14E-02	7.59
regulation of leukocyte adhesion to vascular endothelial cell (GO:1904994)	2.15E-02	7.59
entrainment of circadian clock by photoperiod (GO:0043153)	2.15E-02	7.59
placenta development (GO:0001890)	2.17E-02	3.27
peptide antigen assembly with MHC class II protein complex (GO:0002503)	2.17E-02	11.00
MHC class II protein complex assembly (GO:0002399)	2.17E-02	11.00
positive regulation of phosphate metabolic process (GO:0045937)	2.19E-02	1.80
regulation of pattern recognition receptor signaling pathway (GO:0062207)	2.19E-02	3.84
response to hydrogen peroxide (GO:0042542)	2.19E-02	3.84
positive regulation of pattern recognition receptor signaling pathway (GO:0062208)	2.19E-02	5.87
regulation of natural killer cell mediated cytotoxicity (GO:0042269)	2.19E-02	5.87
positive regulation of phosphorus metabolic process (GO:0010562)	2.20E-02	1.80
regulation of T cell migration (GO:2000404)	2.20E-02	5.87
regulation of T cell receptor signaling pathway (GO:0050856)	2.20E-02	5.87
positive regulation of epithelial cell migration (GO:0010634)	2.25E-02	3.25
negative regulation of RNA metabolic process (GO:0051253)	2.30E-02	1.60
regulation of protein localization (GO:0032880)	2.32E-02	1.82
regulation of monocyte chemotaxis (GO:0090025)	2.40E-02	7.33
blood coagulation (GO:0007596)	2.44E-02	3.02
negative regulation of cysteine-type endopeptidase activity (GO:2000117)	2.46E-02	4.19
regulation of cytokine-mediated signaling pathway (GO:0001959)	2.47E-02	3.20
regulation of peptidyl-tyrosine phosphorylation (GO:0050730)	2.48E-02	2.61
eosinophil chemotaxis (GO:0048245)	2.55E-02	10.35
regulation of calcium ion transport (GO:0051924)	2.56E-02	2.60
macrophage migration (GO:1905517)	2.56E-02	10.35
positive regulation of T cell proliferation (GO:0042102)	2.57E-02	3.74
regulation of cellular localization (GO:0060341)	2.60E-02	1.88
regulation of cytoskeleton organization (GO:0051493)	2.63E-02	2.06
coagulation (GO:0050817)	2.63E-02	2.98
positive regulation of epithelial cell apoptotic process (GO:1904037)	2.68E-02	7.10
positive regulation of T cell migration (GO:2000406)	2.69E-02	7.10
negative regulation of RNA biosynthetic process (GO:1902679)	2.70E-02	1.64
response to oxygen levels (GO:0070482)	2.73E-02	2.43
positive regulation of prostaglandin biosynthetic process (GO:0031394)	2.75E-02	18.85
regulation of wound healing (GO:0061041)	2.76E-02	3.38
response to extracellular stimulus (GO:0009991)	2.78E-02	2.09
innate immune response-activating signal transduction (GO:0002758)	2.86E-02	5.50
positive regulation of phosphorylation (GO:0042327)	2.87E-02	1.82
regulation of cysteine-type endopeptidase activity (GO:2000116)	2.97E-02	2.65
hemostasis (GO:0007599)	2.97E-02	2.93
chaperone cofactor-dependent protein refolding (GO:0051085)	2.97E-02	6.87
Fc receptor signaling pathway (GO:0038093)	2.98E-02	4.60
brown fat cell differentiation (GO:0050873)	2.98E-02	6.87
positive regulation of macrophage chemotaxis (GO:0010759)	2.98E-02	9.78
eosinophil migration (GO:0072677)	2.98E-02	9.78
regulation of cysteine-type endopeptidase activity involved in apoptotic process (GO:0043281)	2.99E-02	2.78
macrophage activation involved in immune response (GO:0002281)	2.99E-02	9.78
negative regulation of interleukin-12 production (GO:0032695)	2.99E-02	9.78
biosynthetic process (GO:0009058)	3.07E-02	1.44
regulation of natural killer cell mediated immunity (GO:0002715)	3.09E-02	5.39
negative regulation of interleukin-6 production (GO:0032715)	3.10E-02	5.39
fat cell differentiation (GO:0045444)	3.15E-02	3.60
regulation of actin polymerization or depolymerization (GO:0008064)	3.16E-02	3.08
regulation of osteoclast differentiation (GO:0045670)	3.16E-02	4.53
regulation of binding (GO:0051098)	3.19E-02	2.25
regulation of actin filament length (GO:0030832)	3.30E-02	3.06
photoperiodism (GO:0009648)	3.30E-02	6.67
negative regulation of response to biotic stimulus (GO:0002832)	3.31E-02	3.57
positive regulation of synaptic transmission, glutamatergic (GO:0051968)	3.31E-02	6.67
negative regulation of antigen receptor-mediated signaling pathway (GO:0050858)	3.31E-02	6.67
regulation of endothelial cell apoptotic process (GO:2000351)	3.35E-02	5.28
negative regulation of leukocyte apoptotic process (GO:2000107)	3.35E-02	5.28
regulation of monocyte differentiation (GO:0045655)	3.44E-02	9.26
positive regulation of endothelial cell apoptotic process (GO:2000353)	3.44E-02	9.26
regulation of lymphocyte anergy (GO:0002911)	3.53E-02	16.50
regulation of T cell anergy (GO:0002667)	3.54E-02	16.50
response to bacterial lipoprotein (GO:0032493)	3.54E-02	16.50
regulation of proteolysis (GO:0030162)	3.55E-02	1.85
reproductive structure development (GO:0048608)	3.55E-02	2.16
negative regulation of proteolysis (GO:0045861)	3.58E-02	2.30
positive regulation of reactive oxygen species metabolic process (GO:2000379)	3.60E-02	4.40
endoderm formation (GO:0001706)	3.62E-02	5.18
regulation of CD4-positive, alpha-beta T cell differentiation (GO:0043370)	3.62E-02	5.18
leukocyte degranulation (GO:0043299)	3.64E-02	6.47
reproductive system development (GO:0061458)	3.68E-02	2.15
positive regulation of peptidyl-tyrosine phosphorylation (GO:0050731)	3.81E-02	2.82
positive regulation of transferase activity (GO:0051347)	3.84E-02	1.97
negative regulation of T cell proliferation (GO:0042130)	3.84E-02	4.34
regulation of establishment of protein localization (GO:0070201)	3.87E-02	2.01
response to peptide (GO:1901652)	3.90E-02	2.13
regulation of actin filament polymerization (GO:0030833)	3.91E-02	3.19
astrocyte differentiation (GO:0048708)	3.91E-02	5.08
leukocyte tethering or rolling (GO:0050901)	3.92E-02	8.80
interferon-gamma-mediated signaling pathway (GO:0060333)	3.93E-02	8.80
MHC protein complex assembly (GO:0002396)	3.93E-02	8.80
leukocyte migration involved in inflammatory response (GO:0002523)	3.94E-02	8.80
peptide antigen assembly with MHC protein complex (GO:0002501)	3.94E-02	8.80
positive regulation of RNA metabolic process (GO:0051254)	3.96E-02	1.49
negative regulation of blood vessel endothelial cell migration (GO:0043537)	3.99E-02	6.28
inflammatory response to antigenic stimulus (GO:0002437)	4.00E-02	6.28
regulation of toll-like receptor signaling pathway (GO:0034121)	4.06E-02	4.28
negative regulation of binding (GO:0051100)	4.13E-02	2.95
positive regulation of protein kinase B signaling (GO:0051897)	4.17E-02	3.41
negative regulation of endothelial cell migration (GO:0010596)	4.19E-02	4.98
response to hormone (GO:0009725)	4.20E-02	1.80
positive regulation of I-kappaB kinase/NF-kappaB signaling (GO:0043123)	4.20E-02	2.78
regulation of cellular response to stress (GO:0080135)	4.28E-02	1.86
response to metal ion (GO:0010038)	4.32E-02	2.24
positive regulation of response to wounding (GO:1903036)	4.32E-02	4.22
actin filament organization (GO:0007015)	4.34E-02	2.43
multi-organism reproductive process (GO:0044703)	4.34E-02	2.76
regulation of translation (GO:0006417)	4.38E-02	2.19
positive regulation of glial cell migration (GO:1903977)	4.38E-02	14.66
positive regulation of interleukin-2 production (GO:0032743)	4.39E-02	6.11
response to mineralocorticoid (GO:0051385)	4.39E-02	6.11
negative regulation of erythrocyte differentiation (GO:0045647)	4.39E-02	14.66
positive regulation of unsaturated fatty acid biosynthetic process (GO:2001280)	4.39E-02	14.66
positive regulation of lymphocyte chemotaxis (GO:0140131)	4.45E-02	8.38
response to manganese ion (GO:0010042)	4.46E-02	8.38
regulation of transcription regulatory region DNA binding (GO:2000677)	4.48E-02	4.89
negative regulation of innate immune response (GO:0045824)	4.56E-02	4.16
regulation of protein kinase activity (GO:0045859)	4.57E-02	1.87
cellular response to metal ion (GO:0071248)	4.64E-02	2.74
cellular response to oxidative stress (GO:0034599)	4.71E-02	2.60
second-messenger-mediated signaling (GO:0019932)	4.72E-02	2.60
regulation of secretion by cell (GO:1903530)	4.80E-02	1.98
negative regulation of MAPK cascade (GO:0043409)	4.98E-02	2.86
response to ketone (GO:1901654)	4.99E-02	2.71
GO cellular component complete	FDR	Fold Enrichment
vesicle (GO:0031982)	9.28E-20	2.04
secretory granule (GO:0030141)	3.65E-17	3.62
cytoplasmic vesicle (GO:0031410)	7.36E-16	2.27
intracellular vesicle (GO:0097708)	9.52E-16	2.27
cytoplasm (GO:0005737)	1.26E-15	1.33
side of membrane (GO:0098552)	6.53E-15	3.73
extracellular vesicle (GO:1903561)	1.96E-14	2.32
extracellular exosome (GO:0070062)	2.21E-14	2.33
extracellular membrane-bounded organelle (GO:0065010)	2.22E-14	2.32
extracellular organelle (GO:0043230)	2.47E-14	2.32
secretory vesicle (GO:0099503)	4.84E-14	3.04
extracellular region (GO:0005576)	8.26E-14	1.78
extracellular space (GO:0005615)	1.15E-13	1.93
cell periphery (GO:0071944)	7.03E-13	1.57
plasma membrane (GO:0005886)	2.08E-12	1.59
cell surface (GO:0009986)	2.85E-12	2.94
external side of plasma membrane (GO:0009897)	5.16E-12	4.02
secretory granule membrane (GO:0030667)	1.03E-11	4.94
specific granule (GO:0042581)	5.00E-11	6.92
cytosolic ribosome (GO:0022626)	5.34E-11	8.88
tertiary granule (GO:0070820)	8.37E-11	6.71
ficolin-1-rich granule (GO:0101002)	1.47E-10	6.18
endocytic vesicle (GO:0030139)	4.11E-10	4.37
endomembrane system (GO:0012505)	7.79E-10	1.62
lysosome (GO:0005764)	7.85E-10	3.03
lytic vacuole (GO:0000323)	8.16E-10	3.03
intracellular anatomical structure (GO:0005622)	9.75E-10	1.18
vesicle membrane (GO:0012506)	1.60E-09	2.47
bounding membrane of organelle (GO:0098588)	1.85E-09	2.03
cytoplasmic vesicle membrane (GO:0030659)	2.12E-09	2.47
vacuole (GO:0005773)	4.64E-09	2.79
intracellular membrane-bounded organelle (GO:0043231)	9.02E-09	1.25
focal adhesion (GO:0005925)	1.41E-08	3.65
cytosol (GO:0005829)	1.41E-08	1.52
secretory granule lumen (GO:0034774)	1.87E-08	4.12
cytoplasmic vesicle lumen (GO:0060205)	2.17E-08	4.09
cell-substrate junction (GO:0030055)	2.19E-08	3.57
vesicle lumen (GO:0031983)	2.42E-08	4.06
membrane (GO:0016020)	2.75E-08	1.30
cellular anatomical entity (GO:0110165)	5.75E-08	1.08
intracellular organelle (GO:0043229)	7.39E-08	1.21
ribosomal subunit (GO:0044391)	4.27E-07	4.94
ribosome (GO:0005840)	4.51E-07	4.48
endocytic vesicle membrane (GO:0030666)	7.33E-07	4.76
cellular_component (GO:0005575)	8.57E-07	1.07
membrane-bounded organelle (GO:0043227)	9.73E-07	1.19
cytosolic small ribosomal subunit (GO:0022627)	1.49E-06	10.75
specific granule membrane (GO:0035579)	3.57E-06	6.77
ficolin-1-rich granule lumen (GO:1904813)	3.83E-06	5.68
organelle (GO:0043226)	4.62E-06	1.16
anchoring junction (GO:0070161)	5.68E-06	2.39
integral component of plasma membrane (GO:0005887)	9.96E-06	1.90
tertiary granule membrane (GO:0070821)	1.44E-05	7.23
intrinsic component of plasma membrane (GO:0031226)	1.64E-05	1.86
MHC protein complex (GO:0042611)	2.23E-05	13.54
polysome (GO:0005844)	3.71E-05	7.33
tertiary granule lumen (GO:1904724)	5.64E-05	8.00
polysomal ribosome (GO:0042788)	7.99E-05	11.00
cytosolic large ribosomal subunit (GO:0022625)	8.20E-05	7.59
organelle membrane (GO:0031090)	8.34E-05	1.50
ficolin-1-rich granule membrane (GO:0101003)	1.19E-04	7.21
specific granule lumen (GO:0035580)	1.21E-04	7.21
small ribosomal subunit (GO:0015935)	1.27E-04	6.28
membrane raft (GO:0045121)	1.49E-04	3.07
membrane microdomain (GO:0098857)	1.54E-04	3.06
vacuolar membrane (GO:0005774)	1.54E-04	2.68
primary lysosome (GO:0005766)	1.75E-04	4.29
azurophil granule (GO:0042582)	1.77E-04	4.29
lysosomal membrane (GO:0005765)	2.11E-04	2.75
lytic vacuole membrane (GO:0098852)	2.14E-04	2.75
MHC class II protein complex (GO:0042613)	3.17E-04	14.66
immunological synapse (GO:0001772)	4.32E-04	8.18
alpha-beta T cell receptor complex (GO:0042105)	5.22E-04	20.00
phagocytic vesicle (GO:0045335)	9.22E-04	4.14
ribonucleoprotein complex (GO:1990904)	1.22E-03	2.18
protein complex involved in cell adhesion (GO:0098636)	1.56E-03	6.64
lumenal side of endoplasmic reticulum membrane (GO:0098553)	2.83E-03	9.10
integral component of lumenal side of endoplasmic reticulum membrane (GO:0071556)	2.87E-03	9.10
membrane-enclosed lumen (GO:0031974)	3.06E-03	1.30
intracellular organelle lumen (GO:0070013)	3.10E-03	1.30
plasma membrane protein complex (GO:0098797)	3.12E-03	2.07
organelle lumen (GO:0043233)	3.14E-03	1.30
ruffle membrane (GO:0032587)	3.33E-03	4.54
Fc-gamma receptor III complex (GO:0033001)	4.93E-03	43.99
CHOP-C/EBP complex (GO:0036488)	4.98E-03	43.99
cell leading edge (GO:0031252)	5.14E-03	2.39
vacuolar lumen (GO:0005775)	6.50E-03	3.31
endocytic vesicle lumen (GO:0071682)	6.56E-03	10.00
lumenal side of membrane (GO:0098576)	6.82E-03	7.33
non-membrane-bounded organelle (GO:0043228)	6.89E-03	1.30
protein-containing complex (GO:0032991)	6.89E-03	1.28
intracellular non-membrane-bounded organelle (GO:0043232)	6.96E-03	1.30
RNA polymerase II transcription regulator complex (GO:0090575)	7.35E-03	2.80
leading edge membrane (GO:0031256)	7.78E-03	3.21
clathrin-coated endocytic vesicle (GO:0045334)	8.29E-03	4.35
clathrin-coated endocytic vesicle membrane (GO:0030669)	8.35E-03	4.89
ruffle (GO:0001726)	8.42E-03	3.18
large ribosomal subunit (GO:0015934)	8.82E-03	3.89
cytolytic granule (GO:0044194)	9.30E-03	13.54
plasma membrane raft (GO:0044853)	9.82E-03	3.83
Fc receptor complex (GO:0032997)	1.11E-02	26.40
transcription factor AP-1 complex (GO:0035976)	1.12E-02	26.40
late endosome (GO:0005770)	1.13E-02	2.57
phagocytic cup (GO:0001891)	1.46E-02	7.86
ER to Golgi transport vesicle membrane (GO:0012507)	1.49E-02	5.05
receptor complex (GO:0043235)	1.49E-02	2.07
gamma-delta T cell receptor complex (GO:0042106)	1.57E-02	22.00
endosome (GO:0005768)	1.63E-02	1.75
integrin complex (GO:0008305)	2.07E-02	7.10
cytoplasmic side of membrane (GO:0098562)	2.44E-02	2.76
Golgi apparatus (GO:0005794)	2.59E-02	1.54
azurophil granule lumen (GO:0035578)	2.73E-02	3.91
COPII-coated ER to Golgi transport vesicle (GO:0030134)	3.28E-02	3.78
cell projection (GO:0042995)	3.50E-02	1.43
MHC class I protein complex (GO:0042612)	3.57E-02	14.66
endoplasmic reticulum (GO:0005783)	3.80E-02	1.46
coated vesicle membrane (GO:0030662)	4.19E-02	2.69
actin cytoskeleton (GO:0015629)	4.20E-02	1.98
plasma membrane signaling receptor complex (GO:0098802)	4.21E-02	2.27
phagocytic vesicle membrane (GO:0030670)	4.42E-02	4.00
CHOP-ATF4 complex (GO:1990617)	4.58E-02	43.99
C/EBP complex (GO:1990647)	4.61E-02	43.99
integrin alphaL-beta2 complex (GO:0034687)	4.65E-02	43.99
azurophil granule membrane (GO:0035577)	4.66E-02	4.55
galectin complex (GO:1990724)	4.69E-02	43.99
basolateral part of cell (GO:1990794)	4.73E-02	43.99
Down-regulated genes
GO molecular function complete	FDR	Fold Enrichment
structural constituent of ribosome (GO:0003735)	9.17E-20	20.43
MHC class II protein complex binding (GO:0023026)	3.84E-09	47.66
structural molecule activity (GO:0005198)	5.21E-09	5.30
MHC protein complex binding (GO:0023023)	2.57E-08	35.74
RNA binding (GO:0003723)	2.10E-07	3.20
rRNA binding (GO:0019843)	2.03E-06	19.50
MHC class II receptor activity (GO:0032395)	3.00E-05	71.49
protein-containing complex binding (GO:0044877)	2.19E-04	2.99
protein phosphatase binding (GO:0019903)	8.89E-04	8.52
immune receptor activity (GO:0140375)	8.90E-04	8.64
peptide antigen binding (GO:0042605)	4.12E-03	19.86
phosphatase binding (GO:0019902)	5.57E-03	6.57
immunoglobulin binding (GO:0019865)	1.52E-02	23.83
binding (GO:0005488)	1.61E-02	1.16
protein binding (GO:0005515)	2.37E-02	1.21
molecular_function (GO:0003674)	2.61E-02	1.10
protein kinase binding (GO:0019901)	3.76E-02	3.05
kinase binding (GO:0019900)	3.95E-02	2.91
nucleic acid binding (GO:0003676)	4.61E-02	1.68
GO biological process complete	FDR	Fold Enrichment
cytoplasmic translation (GO:0002181)	4.53E-22	27.67
translation (GO:0006412)	3.51E-15	10.24
peptide biosynthetic process (GO:0043043)	1.22E-14	9.56
peptide metabolic process (GO:0006518)	1.04E-13	7.71
amide biosynthetic process (GO:0043604)	2.87E-12	7.42
cellular amide metabolic process (GO:0043603)	1.36E-09	5.16
regulation of immune system process (GO:0002682)	1.47E-09	3.72
cellular macromolecule biosynthetic process (GO:0034645)	1.18E-08	5.05
regulation of leukocyte cell-cell adhesion (GO:1903037)	2.65E-08	7.63
positive regulation of immune system process (GO:0002684)	5.41E-08	4.32
immune system process (GO:0002376)	1.12E-07	2.77
MHC class II protein complex assembly (GO:0002399)	1.81E-07	62.55
peptide antigen assembly with MHC class II protein complex (GO:0002503)	1.96E-07	62.55
MHC protein complex assembly (GO:0002396)	5.56E-07	50.04
antigen processing and presentation of exogenous peptide antigen (GO:0002478)	5.70E-07	23.40
peptide antigen assembly with MHC protein complex (GO:0002501)	5.96E-07	50.04
regulation of lymphocyte activation (GO:0051249)	8.91E-07	5.23
positive regulation of leukocyte cell-cell adhesion (GO:1903039)	1.02E-06	8.06
regulation of T cell activation (GO:0050863)	1.14E-06	6.64
regulation of cell-cell adhesion (GO:0022407)	1.16E-06	5.77
regulation of immune response (GO:0050776)	1.70E-06	3.96
antigen processing and presentation of exogenous antigen (GO:0019884)	1.77E-06	19.50
regulation of leukocyte activation (GO:0002694)	1.77E-06	4.72
positive regulation of T cell activation (GO:0050870)	2.41E-06	8.17
immune response (GO:0006955)	3.42E-06	3.03
antigen processing and presentation of exogenous peptide antigen via MHC class II (GO:0019886)	3.51E-06	33.36
antigen processing and presentation of peptide antigen (GO:0048002)	4.30E-06	16.93
positive regulation of lymphocyte activation (GO:0051251)	4.32E-06	5.93
gene expression (GO:0010467)	4.54E-06	2.68
antigen processing and presentation of peptide antigen via MHC class II (GO:0002495)	4.65E-06	31.28
regulation of cell activation (GO:0050865)	4.85E-06	4.36
positive regulation of cell-cell adhesion (GO:0022409)	4.89E-06	6.83
antigen processing and presentation (GO:0019882)	5.77E-06	12.88
antigen processing and presentation of peptide or polysaccharide antigen via MHC class II (GO:0002504)	5.90E-06	29.44
regulation of cell adhesion (GO:0030155)	1.40E-05	4.07
positive regulation of leukocyte activation (GO:0002696)	1.54E-05	5.31
immunoglobulin production involved in immunoglobulin-mediated immune response (GO:0002381)	1.92E-05	23.83
positive regulation of cell activation (GO:0050867)	2.43E-05	5.12
response to stimulus (GO:0050896)	2.84E-05	1.57
macromolecule biosynthetic process (GO:0009059)	3.85E-05	3.10
organonitrogen compound biosynthetic process (GO:1901566)	6.96E-05	3.01
adaptive immune response (GO:0002250)	7.86E-05	4.17
positive regulation of biological process (GO:0048518)	8.27E-05	1.69
negative regulation of immune system process (GO:0002683)	1.33E-04	5.11
cellular nitrogen compound biosynthetic process (GO:0044271)	1.35E-04	2.90
adaptive immune response based on somatic recombination of immune receptors built from immunoglobulin superfamily domains (GO:0002460)	1.43E-04	6.65
positive regulation of response to stimulus (GO:0048584)	1.60E-04	2.39
regulation of B cell proliferation (GO:0030888)	2.22E-04	15.40
positive regulation of cell death (GO:0010942)	2.80E-04	4.20
positive regulation of programmed cell death (GO:0043068)	3.03E-04	4.42
cell activation (GO:0001775)	3.09E-04	3.94
positive regulation of immune response (GO:0050778)	3.88E-04	4.08
regulation of response to stimulus (GO:0048583)	3.90E-04	1.89
leukocyte activation (GO:0045321)	4.03E-04	4.30
ribosomal small subunit biogenesis (GO:0042274)	4.34E-04	13.53
leukocyte mediated immunity (GO:0002443)	4.56E-04	5.82
positive regulation of cell adhesion (GO:0045785)	4.78E-04	4.51
lymphocyte mediated immunity (GO:0002449)	5.47E-04	6.34
lymphocyte activation (GO:0046649)	5.70E-04	4.75
positive regulation of cellular process (GO:0048522)	6.09E-04	1.67
positive regulation of gene expression (GO:0010628)	1.21E-03	2.91
immune effector process (GO:0002252)	1.23E-03	4.42
humoral immune response (GO:0006959)	1.51E-03	5.09
positive regulation of cellular protein metabolic process (GO:0032270)	1.69E-03	2.61
regulation of lymphocyte proliferation (GO:0050670)	1.98E-03	6.11
regulation of antigen receptor-mediated signaling pathway (GO:0050854)	2.15E-03	13.40
regulation of mononuclear cell proliferation (GO:0032944)	2.17E-03	6.03
immunoglobulin mediated immune response (GO:0016064)	2.48E-03	6.77
positive regulation of alpha-beta T cell activation (GO:0046635)	2.84E-03	12.62
B cell mediated immunity (GO:0019724)	2.86E-03	6.63
regulation of programmed cell death (GO:0043067)	3.15E-03	2.51
positive regulation of apoptotic process (GO:0043065)	3.39E-03	3.96
biological regulation (GO:0065007)	3.40E-03	1.28
regulation of mitochondrial membrane potential (GO:0051881)	3.43E-03	12.08
response to organic substance (GO:0010033)	3.67E-03	2.03
regulation of leukocyte proliferation (GO:0070663)	3.69E-03	5.56
positive regulation of protein metabolic process (GO:0051247)	3.91E-03	2.46
regulation of biological process (GO:0050789)	4.14E-03	1.30
cellular response to chemical stimulus (GO:0070887)	4.53E-03	2.04
regulation of intrinsic apoptotic signaling pathway (GO:2001242)	5.86E-03	6.89
regulation of cell death (GO:0010941)	6.10E-03	2.37
regulation of translation (GO:0006417)	6.33E-03	4.27
regulation of production of molecular mediator of immune response (GO:0002700)	6.38E-03	6.77
positive regulation of cysteine-type endopeptidase activity involved in apoptotic process (GO:0043280)	8.69E-03	7.76
regulation of cellular process (GO:0050794)	8.87E-03	1.31
ribosome biogenesis (GO:0042254)	1.04E-02	4.83
regulation of immune effector process (GO:0002697)	1.13E-02	4.33
cellular response to organic substance (GO:0071310)	1.16E-02	2.13
antimicrobial humoral response (GO:0019730)	1.43E-02	7.05
positive regulation of translation (GO:0045727)	1.45E-02	7.05
positive regulation of intrinsic apoptotic signaling pathway (GO:2001244)	1.46E-02	12.12
non-membrane-bounded organelle assembly (GO:0140694)	1.48E-02	4.58
positive regulation of lymphocyte proliferation (GO:0050671)	1.52E-02	6.95
positive regulation of mononuclear cell proliferation (GO:0032946)	1.64E-02	6.86
regulation of cell population proliferation (GO:0042127)	1.64E-02	2.24
ribosome assembly (GO:0042255)	1.66E-02	11.53
cellular protein metabolic process (GO:0044267)	1.67E-02	1.79
positive regulation of cysteine-type endopeptidase activity (GO:2001056)	1.70E-02	6.76
regulation of cellular amide metabolic process (GO:0034248)	1.83E-02	3.73
hemopoiesis (GO:0030097)	2.06E-02	3.24
positive regulation of metabolic process (GO:0009893)	2.13E-02	1.72
CD8-positive, alpha-beta T cell activation (GO:0036037)	2.14E-02	35.74
regulation of alpha-beta T cell activation (GO:0046634)	2.15E-02	8.02
regulation of cellular component movement (GO:0051270)	2.38E-02	2.58
regulation of cellular macromolecule biosynthetic process (GO:2000112)	2.39E-02	3.37
immune system development (GO:0002520)	2.39E-02	3.02
positive regulation of leukocyte proliferation (GO:0070665)	2.45E-02	6.26
immunoglobulin production (GO:0002377)	2.48E-02	6.26
regulation of B cell activation (GO:0050864)	2.59E-02	5.27
negative regulation of immune effector process (GO:0002698)	2.63E-02	7.59
production of molecular mediator of immune response (GO:0002440)	2.66E-02	6.14
negative regulation of lymphocyte migration (GO:2000402)	2.91E-02	30.64
regulation of protein metabolic process (GO:0051246)	3.08E-02	1.89
positive regulation of cellular amide metabolic process (GO:0034250)	3.10E-02	5.96
positive regulation of catalytic activity (GO:0043085)	3.27E-02	2.42
B cell activation (GO:0042113)	3.29E-02	5.89
positive regulation of endopeptidase activity (GO:0010950)	3.71E-02	5.75
leukocyte differentiation (GO:0002521)	3.76E-02	3.94
hematopoietic or lymphoid organ development (GO:0048534)	3.76E-02	3.01
negative regulation of endoplasmic reticulum unfolded protein response (GO:1900102)	3.80E-02	26.81
regulation of response to stress (GO:0080134)	3.80E-02	2.29
positive regulation of T cell receptor signaling pathway (GO:0050862)	3.83E-02	26.81
regulation of multicellular organismal process (GO:0051239)	3.85E-02	1.84
mononuclear cell differentiation (GO:1903131)	3.91E-02	4.30
alpha-beta T cell activation (GO:0046631)	3.94E-02	8.94
positive regulation of B cell proliferation (GO:0030890)	3.96E-02	13.30
positive regulation of multicellular organismal process (GO:0051240)	4.00E-02	2.21
post-transcriptional regulation of gene expression (GO:0010608)	4.04E-02	3.32
alpha-beta T cell lineage commitment (GO:0002363)	4.17E-02	25.23
positive regulation of cell population proliferation (GO:0008284)	4.23E-02	2.59
activation of cysteine-type endopeptidase activity involved in apoptotic process (GO:0006919)	4.32E-02	8.61
regulation of membrane depolarization (GO:0003254)	4.34E-02	12.71
positive regulation of apoptotic signaling pathway (GO:2001235)	4.36E-02	6.65
regulation of T cell receptor signaling pathway (GO:0050856)	4.37E-02	12.71
regulation of cellular protein metabolic process (GO:0032268)	4.37E-02	1.90
regulation of molecular function (GO:0065009)	4.40E-02	1.76
lymphocyte proliferation (GO:0046651)	4.48E-02	8.51
mononuclear cell proliferation (GO:0032943)	4.93E-02	8.31
GO cellular component complete	FDR	Fold Enrichment
cytosolic ribosome (GO:0022626)	1.26E-27	35.74
ribosomal subunit (GO:0044391)	9.40E-21	19.11
ribosome (GO:0005840)	2.45E-20	16.45
cytosolic small ribosomal subunit (GO:0022627)	6.21E-14	41.31
ribonucleoprotein complex (GO:1990904)	6.56E-13	6.24
cytosolic large ribosomal subunit (GO:0022625)	1.74E-11	29.58
small ribosomal subunit (GO:0015935)	1.79E-11	24.14
MHC protein complex (GO:0042611)	4.51E-10	49.49
extracellular exosome (GO:0070062)	4.34E-09	3.00
extracellular membrane-bounded organelle (GO:0065010)	4.35E-09	2.96
vesicle (GO:0031982)	4.52E-09	2.27
extracellular organelle (GO:0043230)	4.71E-09	2.96
extracellular vesicle (GO:1903561)	5.06E-09	2.96
large ribosomal subunit (GO:0015934)	1.04E-08	15.18
protein-containing complex (GO:0032991)	1.65E-08	1.93
MHC class II protein complex (GO:0042613)	3.72E-08	55.60
focal adhesion (GO:0005925)	2.04E-07	6.10
cell-substrate junction (GO:0030055)	2.65E-07	5.97
polysome (GO:0005844)	2.67E-07	19.50
lumenal side of endoplasmic reticulum membrane (GO:0098553)	4.62E-07	34.51
integral component of lumenal side of endoplasmic reticulum membrane (GO:0071556)	4.85E-07	34.51
side of membrane (GO:0098552)	6.31E-07	4.44
extracellular space (GO:0005615)	1.48E-06	2.17
lumenal side of membrane (GO:0098576)	1.50E-06	27.80
ER to Golgi transport vesicle membrane (GO:0012507)	3.74E-05	16.41
anchoring junction (GO:0070161)	4.92E-05	3.54
extracellular region (GO:0005576)	7.93E-05	1.86
intrinsic component of plasma membrane (GO:0031226)	1.06E-04	2.53
endocytic vesicle membrane (GO:0030666)	1.13E-04	7.37
integral component of plasma membrane (GO:0005887)	1.16E-04	2.57
cell surface (GO:0009986)	1.20E-04	3.19
endosome (GO:0005768)	2.32E-04	3.05
endomembrane system (GO:0012505)	2.37E-04	1.75
clathrin-coated endocytic vesicle (GO:0045334)	3.21E-04	11.00
polysomal ribosome (GO:0042788)	3.30E-04	22.34
COPII-coated ER to Golgi transport vesicle (GO:0030134)	3.57E-04	10.76
endoplasmic reticulum (GO:0005783)	8.05E-04	2.26
clathrin-coated endocytic vesicle membrane (GO:0030669)	9.25E-04	11.91
endocytic vesicle (GO:0030139)	1.94E-03	4.60
cell periphery (GO:0071944)	2.12E-03	1.53
plasma membrane protein complex (GO:0098797)	2.83E-03	3.16
coated vesicle membrane (GO:0030662)	4.46E-03	5.84
trans-Golgi network membrane (GO:0032588)	4.88E-03	8.49
intracellular vesicle (GO:0097708)	6.97E-03	1.96
cytoplasmic vesicle (GO:0031410)	7.07E-03	1.96
cell junction (GO:0030054)	7.39E-03	2.03
external side of plasma membrane (GO:0009897)	7.53E-03	3.57
cytosol (GO:0005829)	8.17E-03	1.55
transport vesicle membrane (GO:0030658)	8.99E-03	5.13
integral component of endoplasmic reticulum membrane (GO:0030176)	9.34E-03	5.92
transport vesicle (GO:0030133)	9.40E-03	3.72
plasma membrane (GO:0005886)	1.18E-02	1.49
intrinsic component of endoplasmic reticulum membrane (GO:0031227)	1.20E-02	5.65
coated vesicle (GO:0030135)	1.48E-02	4.16
clathrin-coated vesicle membrane (GO:0030665)	1.52E-02	6.50
organelle (GO:0043226)	2.16E-02	1.19
B cell receptor complex (GO:0019815)	2.53E-02	71.49
clathrin-coated vesicle (GO:0030136)	3.04E-02	4.72
membrane-bounded organelle (GO:0043227)	3.09E-02	1.20
membrane-enclosed lumen (GO:0031974)	4.43E-02	1.45
intracellular organelle lumen (GO:0070013)	4.50E-02	1.45
organelle lumen (GO:0043233)	4.58E-02	1.45

## Sheet: SUPPLEMENTARY TABLE S6
Supplementary Table S6. Reactome Pathways analysis with deregulated genes of NOTCH1-M versus -WT
Up-regulated genes
Reactome Pathway	FDR	Rich Factor	Genes
Autophagy
Chaperone Mediated Autophagy	0.050	0.19	RPL8,RPL6,RPL39,RPS4Y1,RPL41,RPLP1,RPLP0,RPLP2,RPL11,RPS2,RPS8,RPL37A,RPL35A,EIF3H,RPS14,RPS12,RPS26,RPS29,RPS20,RPS24,EEF1A1
Cell-cell Communication
Signal regulatory protein family interactions	0.085	0.231	GZMH,CTSG,CTSD,MME
Cellular Response to Stimuli
Response of EIF2AK4 (GCN2) to amino acid deficiency	1.26E-10	0.217	MYLK,MYL6,ANXA1,ITGB5,DYSF,PXN
Cellular response to starvation	1.10E-07	0.143	RPL8,RPL6,RPL39,RPS4Y1,RPL41,RPLP1,RPLP0,RPLP2,RPL11,RPS2,RPS8,RPL37A,RPL35A,RPS14,RPS12,RPS26,RPS29,RPS20,RPS24,UBC
Cellular responses to stress	2.11E-04	0.061	JUNB,GBP5,FPR1,GATA3,HIF1A,HLA-DRB1,RPLP0,HLA-DPA1,ANXA1,FOS,DUSP6,PTGS2,STAT6,CSF3R,IL5RA,TNF,PIM1,IL13RA1,CSF1R,HSP90B1,MCL1,HLA-DRA,EIF4G2,ITGB2,HSP90AA1,TNFRSF1B,LCP1,CCL5,CCL4,CCL3,CCL2,FCGR1B,PTPN6,IFITM3,IFITM1,IFITM2,IFI30,IFIT1,IFIT3,IFIT2,MT2A,B2M,TRIM22,RSAD2,HLA-B,HLA-C,TALDO1,EGR1,CD27,CTSG,CD36,CCR2,TNFRSF12A,IL15,HCK,IL32,UBC,SMAD3,ISG15,NFKBIA,IL8,IL7R,CXCL2,OASL,CASP1,IRF8,LTB,GB…
PERK regulates gene expression	1.62E-03	0.212	ITGA5,CEACAM6,CEACAM8
ATF4 activates genes in response to endoplasmic reticulum stress	4.39E-03	0.214	DDIT3,ATF4,ASNS,CEBPB
ATF6 (ATF6-alpha) activates chaperone genes	4.82E-03	0.4	B2M,HLA-B,HLA-C
ATF6 (ATF6-alpha) activates chaperones	8.40E-03	0.333	MSI2,HSP90AA1,CCT2,ACTG1
Response of EIF2AK1 (HRI) to heme deficiency	0.0178	0.267	DDIT3,ATF4,HSP90B1,ASNS,CEBPB,CCL2,LMNA,HSPA5,IL8
HSF1 activation	0.0327	0.167	HLA-DRB1,HLA-DPA1,HLA-DRA,CD247,CD3G,CD3E,CD3D
Unfolded Protein Response (UPR)	0.041	0.093	RPL8,RPL6,RPL39,RPS4Y1,RPL41,RPLP1,RPLP0,RPLP2,RPL11,RPS2,RPS8,RPL37A,RPL35A,EIF3H,RPS14,RPS12,RPS26,RPS29,RPS20,RPS24
HSP90 chaperone cycle for steroid hormone receptors (SHR) in the presence of ligand	0.074	0.132	GBP5,HLA-DRB1,HLA-DPA1,HLA-DRA,FCGR1B,PTPN6,IFI30,MT2A,B2M,TRIM22,HLA-B,HLA-C,OASL,IRF8,GBP2,GBP1
Development biology
Signaling by ROBO receptors	1.86E-05	0.103	HLA-DRB1,ITK,HLA-DPA1,HLA-DRA,LCP2,FYB,CD247,VASP,CD3G,CD3E,CD3D,ZAP70
Regulation of expression of SLITs and ROBOs	2.51E-05	0.113	RPL8,RPL6,RPL39,RPS4Y1,RPL41,RPLP1,RPLP0,RPLP2,RPL11,RPS2,RPS8,RPL37A,RPL35A,RPS14,RPS12,RPS26,RPS29,RPS20,RPS24
Axon guidance	5.25E-04	0.065	GMFG,CFD,FPR1,CFP,PLAC8,S100A11,SERPINA1,ARG1,DYNLL1,GRN,HSPA1A,OLFM4,ADAM8,S100A8,DEFA4,ITGB2,ITGAL,HSP90AA1,CR1,TNFRSF1B,BPI,FGL2,FCGR2A,MNDA,PTPN6,FTH1,B2M,HLA-B,HLA-C,CD14,BST1,HBB,GLIPR1,CTSG,CD36,CTSD,CAMP,CD33,CCT2,FCER1G,MME,CEACAM6,CEACAM8,CD63,CSTB,CST3,CXCR1,CXCR2,FCN1,COTL1,CD93,CYBB,CYBA,EEF1A1,TYROBP,C5AR1,MGAM,HSPA6,SELL,MS4A3,SLC2A3,FGR,CHI3L1,CLEC12A
Nervous system development	1.28E-03	0.062	GMFG,TXNIP,CFD,FPR1,CFP,PLAC8,KLRK1,S100A11,ITK,SERPINA1,GNLY,ARG1,FOS,DYNLL1,DUSP6,GRN,STAT6,HSPA1A,OLFM4,ADAM8,CLEC4E,S100A8,HSP90B1,CLEC7A,PI3,DEFA4,DEFA3,ARPC2,ARPC3,ITGB2,ITGAL,FCGR3A,HSP90AA1,CR1,TNFRSF1B,BPI,LCP2,FGL2,FCGR2A,MNDA,PTPN6,CD247,ACTB,FTH1,B2M,HLA-B,HLA-C,CD14,BST1,HBB,CD3G,GLIPR1,CTSG,CD36,CTSD,CAMP,CD33,CCR2,CCT2,FCER1G,MME,HCK,CEACAM6,TLR8,CEACAM8,CD63,CSTB,CST3,CXCR1,CXCR2,…
Extracellular Matrix Organization
Fibronectin matrix formation	0.012	0.5	B2M,HLA-B,HLA-C,HSPA5
Gene Expression (Transcription)
RUNX3 Regulates Immune Response and Cell Migration	0.012	0.5	FYB,PTPN6,TYROBP
Hemostasis
Platelet activation. signaling and aggregation	0.038	0.065	RPL8,RPL6,RPL39,DDIT3,ATF4,RPS4Y1,RPL41,RPLP1,RPLP0,RPLP2,RPL11,RPS2,RPS8,ASNS,RPL37A,CEBPB,RPL35A,RPS14,RPS12,RPS26,RPS29,RPS20,RPS24
Immune system
Innate Immune System	3e-14	0.079	RPL8,RPL6,RPL39,RPS4Y1,RPL41,RPLP1,RPLP0,RPLP2,RPL11,RPS2,RPS8,RPL37A,RPL35A,RPS14,RPS12,RPS26,RPS29,RPS20,RPS24
Cytokine Signaling in Immune system	3.23E-14	0.098	RPL8,RPL6,RPL39,RPS4Y1,RPL41,RPLP1,RPLP0,RPLP2,RPL11,RPS2,RPS8,RPL37A,RPL35A,EIF3H,RPS14,RPS12,RPS26,RPS29,RPS20,RPS24
Neutrophil degranulation	3.23E-14	0.134	FPR1,PTGS2,TNF,TNFRSF1B,CCL5,CCL4,CCL3,CCL2,CCR2,IL8,CXCL2
Signaling by Interleukins	3.00E-08	0.093	RPL8,RPL6,RPL39,RPS4Y1,RPL41,RPLP1,RPLP0,RPLP2,RPL11,RPS2,RPS8,RPL37A,RPL35A,RPS14,RPS12,RPS26,RPS29,RPS20,RPS24
Interferon Signaling	3.26E-08	0.132	KLRK1,ICOS,HLA-DRB1,ITK,HLA-DPA1,DYNLL1,RNF130,MYLIP,LAG3,S100A8,CD300LF,CD160,HLA-DRA,ITGB5,ITGB2,ITGAL,FCGR3A,ITGA4,LCP2,FYB,FCGR1B,CLEC2B,PTPN6,CD247,CLEC2D,IFITM1,IFI30,B2M,HLA-B,HLA-C,CD14,VASP,SH2D1A,CD28,CD3G,CD3E,CD3D,CD36,CTSD,CD33,LILRA5,LAIR2,CD74,CYBB,CYBA,TYROBP,CD8B,CD8A,KLRB1,UBC,HSPA5,NFKBIA,SELL,ZAP70,TRAT1
Interleukin-4 and Interleukin-13 signaling	1.62E-07	0.17	RPL8,RPL6,RPL39,MYL6,RPS4Y1,RPL41,RPLP1,RPLP0,RPLP2,RPL11,RPS2,RPS8,ARPC2,ARPC3,HSP90AA1,RPL37A,ITGA5,RPL35A,NELL2,ACTB,RPS14,RPS12,ANK3,EZR,PFN1,VASP,RPS26,RPS29,RPS20,RPS24,RHOB,ACTG1,TYROBP,UBC,ARHGEF11
Immunoregulatory interactions between a Lymphoid and a non-Lymphoid cell	2.77E-07	0.12	RPL8,RPL6,RPL39,RPS4Y1,RPL41,RPLP1,RPLP0,RPLP2,RPL11,RPS2,RPS8,RPL37A,RPL35A,RPS14,RPS12,RPS26,RPS29,RPS20,RPS24
Generation of second messenger molecules	3.62E-07	0.293	HSP90AA1,HBB,EEF1A1,UBC
Interferon alpha/beta signaling	3.98E-07	0.208	JUNB,JUND,FOS,DUSP6,FOSB,EGR1,ID2,SGK1
Interferon gamma signaling	1.62E-06	0.172	ITGB5,CD36,CYBB,CYBA
Adaptive Immune System	2.39E-06	0.066	RPL8,RPL6,RPL39,RPS4Y1,RPL41,RPLP1,RPLP0,RPLP2,RPL11,RPS2,RPS8,RPL37A,RPL35A,RPS14,RPS12,RPS26,RPS29,RPS20,RPS24,EEF1A1
Interleukin-10 signaling	1.02E-05	0.234	HSPA1A,HSP90AA1,DNAJB1,EEF1A1,HSPA6
Translocation of ZAP-70 to Immunological synapse	5.20E-05	0.308	MSI2,HSP90AA1,CCT2,ACTG1,VIM
PD-1 signaling	1.42E-04	0.267	CFD,SERPINA1,TMSB4X,DGKA,ARRB1,ARRB2,LCP2,PTPN6,PFN1,CTSW,CD36,FCER1G,RHOB,CD63,HSPA5,GNAQ,GNB4
TCR signaling	2.68E-04	0.119	RPL8,RPL6,RPL39,RPS4Y1,RPL41,RPLP1,RPLP0,RPLP2,RPL11,RPS2,RPS8,RPL37A,RPL35A,RPS14,RPS12,RPS26,RPS29,RPS20,RPS24
Phosphorylation of CD3 and TCR zeta chains	7.64E-04	0.241	KLRK1,LCP2,B2M,HLA-B,HLA-C,TYROBP
Cross-presentation of particulate exogenous antigens (phagosomes)	2.31E-03	0.5	DYNLL1,HSPA1A,HSP90AA1,DNAJB1,DNAJA4
Costimulation by the CD28 family	2.64E-03	0.132	RPL8,RPL6,RPL39,RPS4Y1,RPL41,RPLP1,RPLP0,RPLP2,RPL11,RPS2,RPS8,RPL37A,RPL35A,RPS14,RPS12,RPS26,RPS29,RPS20,RPS24
Antigen processing-Cross presentation	9.72E-03	0.101	KLRK1,CD300LF,CD160,ITGB2,ITGAL,FCGR3A,ITGA4,CLEC2B,CD247,CLEC2D,IFITM1,B2M,HLA-B,HLA-C,SH2D1A,CD3G,CD3E,CD3D,CD33,LILRA5,LAIR2,TYROBP,CD8B,CD8A,KLRB1,SELL
Downstream TCR signaling	0.021	0.096	RPL8,RPL6,RPL39,RPS4Y1,RPL41,RPLP1,RPLP0,RPLP2,RPL11,RPS2,RPS8,RPL37A,RPL35A,EIF3H,RPS14,RPS12,RPS26,RPS29,RPS20,RPS24
DAP12 interactions	0.034	0.136	RPL8,RPL6,RPL39,RPS4Y1,RPL41,RPLP1,RPLP0,RPLP2,RPL11,RPS2,RPS8,RPL37A,RPL35A,NELL2,RPS14,RPS12,PFN1,VASP,RPS26,RPS29,RPS20,RPS24,UBC
Antimicrobial peptides	0.038	0.095	RPL8,RPL6,RPL39,RPS4Y1,RPL41,RPLP1,RPLP0,RPLP2,RPL11,RPS2,RPS8,RPL37A,RPL35A,EIF3H,RPS14,RPS12,RPS26,RPS29,RPS20,RPS24
Endosomal/Vacuolar pathway	0.069	0.25	GNLY,S100A8,PI3,DEFA4,DEFA3,BPI,CTSG,CAMP,CCR2
Antigen Presentation: Folding. assembly and peptide loading of class I MHC	0.085	0.16	CX3CR1,CCL5,CCL4,CCL3,CCL2,CCR3,CCR2,CXCR1,CXCR2,CXCL2
Metabolism
Selenocysteine synthesis	3.26E-08	0.194	S100A8,ITGB5,FCGR1B,B2M,HLA-B,HLA-C,CD14,CD36,CYBB,CYBA,UBC
Selenoamino acid metabolism	4.57E-07	0.156	RPS4Y1,RPS2,RPS8,EIF3H,RPS14,RPS12,RPS26,RPS29,RPS20,RPS24
Metabolism of amino acids and derivatives	5.30E-03	0.066	RPL8,RPL6,RPL39,RPS4Y1,RPL41,RPLP1,RPLP0,RPLP2,RPL11,RPS2,RPS8,RPL37A,RPL35A,RPS14,RPS12,RPS26,RPS29,RPS20,RPS24,EEF1A1
Metabolism of Proteins
Peptide chain elongation	4.74E-09	0.213	ITGAL,ITGA4,RUNX3
Eukaryotic Translation Elongation	9.64E-09	0.202	PROK2,CMKLR1,FPR1,GPR183,ANXA1,UTS2,CX3CR1,CCL5,CCL4,CCL3,CCL2,LPAR6,FFAR2,CCR3,CCR2,PTGER4,CXCR1,CXCR2,F2RL1,C5AR1,CXCL2,S1PR3
Formation of a pool of free 40S subunits	2.69E-08	0.189	DDIT3,ATF4,HSP90B1,HSPA5
Eukaryotic Translation Termination	3.26E-08	0.194	DDIT3,ATF4,HSP90B1,HSPA5
L13a-mediated translational silencing of Ceruloplasmin expression	6.64E-08	0.172	ICOS,HLA-DRB1,HLA-DPA1,HLA-DRA,PTPN6,CD247,CD28,CD3G,CD3E,CD3D
GTP hydrolysis and joining of the 60S ribosomal subunit	7.10E-08	0.171	DDIT3,ATF4,ASNS,CEBPB,CCL2,HSPA5,IL8
Eukaryotic Translation Initiation	1.54E-07	0.161	RPL8,RPL6,RPL39,RPS4Y1,RPL41,RPLP1,RPLP0,RPLP2,RPL11,RPS2,RPS8,RPL37A,RPL35A,RPS14,RPS12,RPS26,RPS29,RPS20,RPS24
Cap-dependent Translation Initiation	1.54E-07	0.161	RPS4Y1,RPS2,RPS8,EIF3H,RPS14,RPS12,RPS26,RPS29,RPS20,RPS24
SRP-dependent cotranslational protein targeting to membrane	3.62E-07	0.16	HLA-DRB1,ITK,HLA-DPA1,HLA-DRA,LCP2,FYB,CD247,VASP,CD3G,CD3E,CD3D,UBC,NFKBIA,ZAP70,TRAT1
Formation of the ternary complex. and subsequently. the 43S complex	1.92E-04	0.189	RPL8,RPL6,RPL39,RPS4Y1,OAZ1,RPL41,RPLP1,RPLP0,RPLP2,ARG1,RPL11,RPS2,SAT1,RPS8,ASNS,SERINC5,RPL37A,RPL35A,RPS14,GLUL,RPS12,RPS26,RPS29,RPS20,RPS24
Ribosomal scanning and start codon recognition	4.44E-04	0.167	RPS4Y1,RPS2,RPS8,EIF3H,RPS14,RPS12,RPS26,RPS29,RPS20,RPS24
Translation initiation complex formation	4.44E-04	0.167	RPL8,RPL6,RPL39,MYL6,RPS4Y1,RPL41,RPLP1,RPLP0,RPLP2,RPL11,RPS2,RPS8,ARPC2,ARPC3,HSP90AA1,RPL37A,ITGA5,RPL35A,NELL2,ACTB,RPS14,RPS12,ANK3,EZR,PFN1,VASP,RPS26,RPS29,RPS20,RPS24,RHOB,ACTG1,TYROBP,UBC,ARHGEF11
Activation of the mRNA upon binding of the cap-binding complex and eIFs. and subsequent binding to 43S	5.10E-04	0.164	RPS4Y1,RPS2,RPS8,EIF3H,RPS14,RPS12,RPS26,RPS29,RPS20,RPS24
Translation	8.40E-03	0.069	JUNB,FPR1,GATA3,HIF1A,RPLP0,ANXA1,FOS,DUSP6,PTGS2,STAT6,CSF3R,IL5RA,TNF,PIM1,IL13RA1,CSF1R,HSP90B1,MCL1,ITGB2,HSP90AA1,TNFRSF1B,LCP1,CCL5,CCL4,CCL3,CCL2,PTPN6,TALDO1,CTSG,CD36,CCR2,IL15,HCK,IL32,UBC,SMAD3,NFKBIA,IL8,IL7R,CXCL2,CASP1,VIM
Metabolism of Angiotensinogen to Angiotensins	0.032	0.222	HLA-DRB1,HLA-DPA1,HLA-DRA,CD247,CD3G,CD3E,CD3D,UBC,NFKBIA,TRAT1
Metabolism of RNA
Nonsense Mediated Decay (NMD) independent of the Exon Junction Complex (EJC)	3.93E-08	0.19	PROK2,FPR1,ANXA1,UTS2,CX3CR1,CCL5,CCL4,CCL3,CCL2,CCR3,CCR2,CXCR1,CXCR2,F2RL1,C5AR1,CXCL2
Nonsense-Mediated Decay (NMD)	3.83E-07	0.158	RPL8,RPL6,RPL39,DDIT3,TXNIP,ATF4,RPS4Y1,HIF1A,RPL41,RPLP1,RPLP0,RPLP2,FOS,DYNLL1,RPL11,RPS2,CDKN2D,HSPA1A,RPS8,HSP90B1,ASNS,CDK6,HSP90AA1,RPL37A,CEBPB,DNAJB1,CCL2,RPL35A,DNAJA4,RPS14,RPS12,RPS26,RPS29,RPS20,RPS24,CITED2,HBB,LMNA,CYBB,CYBA,EEF1A1,UBC,HSPA5,HSPA6,IL8
Nonsense Mediated Decay (NMD) enhanced by the Exon Junction Complex (EJC)	3.83E-07	0.158	RPL8,RPL6,RPL39,RPS4Y1,RPL41,RPLP1,RPLP0,RPLP2,RPL11,RPS2,RPS8,RPL37A,RPL35A,RPS14,RPS12,RPS26,RPS29,RPS20,RPS24
Major pathway of rRNA processing in the nucleolus and cytosol	2.12E-04	0.101	JUNB,GATA3,HIF1A,ANXA1,FOS,PTGS2,STAT6,TNF,PIM1,IL13RA1,HSP90B1,MCL1,ITGB2,HSP90AA1,TNFRSF1B,CCL2,CD36,IL8,VIM
rRNA processing in the nucleus and cytosol	3.94E-04	0.095	RPL8,RPL6,RPL39,DDIT3,ATF4,RPS4Y1,RPL41,RPLP1,RPLP0,RPLP2,RPL11,RPS2,RPS8,ASNS,RPL37A,CEBPB,RPL35A,RPS14,RPS12,RPS26,RPS29,RPS20,RPS24
rRNA processing	3.01E-03	0.08	RPL8,RPL6,RPL39,RPS4Y1,RPL41,RPLP1,RPLP0,RPLP2,RPL11,RPS2,RPS8,RPL37A,RPL35A,RPS14,RPS12,RPS26,RPS29,RPS20,RPS24
Muscle Contraction
Smooth Muscle Contraction	0.02	0.154	HLA-DRB1,HLA-DPA1,HLA-DRA,PTPN6,CD247,CD3G,CD3E,CD3D
Signal Transduction
Chemokine receptors bind chemokines	3.16E-04	0.175	JUNB,JUND,FOS,FOSB,EGR1,ID2,SGK1
NGF-stimulated transcription	4.64E-03	0.175	DDIT3,ATF4,ASNS,CEBPB,CCL2,IL8
Peptide ligand-binding receptors	7.94E-03	0.081	GBP5,HLA-DRB1,HLA-DPA1,HLA-DRA,EIF4G2,FCGR1B,PTPN6,IFITM3,IFITM1,IFITM2,IFI30,IFIT1,IFIT3,IFIT2,MT2A,B2M,TRIM22,RSAD2,HLA-B,HLA-C,EGR1,UBC,ISG15,OASL,IRF8,GBP2,GBP1
Class A/1 (Rhodopsin-like receptors)	0.011	0.066	RPL8,RPL6,RPL39,RPS4Y1,RPL41,RPLP1,RPLP0,RPLP2,RPL11,RPS2,RPS8,RPL37A,RPL35A,EIF3H,RPS14,RPS12,RPS26,RPS29,RPS20,RPS24
Nuclear Events (kinase and transcription factor activation)	0.011	0.129	PTPN6,IFITM3,IFITM1,IFITM2,IFIT1,IFIT3,IFIT2,RSAD2,HLA-B,HLA-C,EGR1,ISG15,OASL,IRF8,GBP2
RHOBTB GTPase Cycle	0.058	0.143	HLA-DRB1,HLA-DPA1,HLA-DRA,CD247,CD3G,CD3E,CD3D,ZAP70
RHOBTB2 GTPase cycle	0.069	0.174	RPL8,RPL6,RPL39,RPS4Y1,RPL41,RPLP1,RPLP0,RPLP2,RPL11,RPS2,RPS8,RPL37A,RPL35A,RPS14,RPS12,RPS26,RPS29,RPS20,RPS24
Down-regulated genes
Reactome Pathway	FDR	Rich Factor	Genes
Cellular Response to Stimuli
Cellular response to starvation	3.00E-15	0.155	RPL5,RPL30,RPL3,RPS16,RPS19,RPL36AL,RPS18,SESN1,RPL36,RPL38,RPS11,RPS9,RPS5,RPS6,RPL27,RPL29,RPL28,RPS25,RPS21,RPS4X,RPL13A,RPS3,RPL13,RPL18,FAU
Response of EIF2AK4 (GCN2) to amino acid deficiency	3.00E-15	0.226	RPL5,RPL30,RPL3,RPS16,RPS19,RPL36AL,RPS18,RPL36,RPL38,RPS11,RPS9,RPS5,RPS6,RPL27,RPL29,RPL28,RPS25,RPS21,RPS4X,RPL13A,RPS3,RPL13,RPL18,FAU
Cellular responses to stress	7.99E-12	0.041	RPL5,RPL30,RPL3,ETS1,RPS16,RPS19,RPL36AL,RPS18,SESN1,RPL36,RPL38,RPS11,RPS9,RPS5,RPS6,RPL27,RPL29,RPL28,UBB,JUN,RPS25,RPS21,RPS4X,RPL13A,PPP1R15A,CAMK2D,RPS3,RPL13,RPL18,FAU
Development biology
Nervous system development	3.00E-15	0.055	RPL5,RPL30,RPL3,RPS16,RPS19,RPL36AL,RPS18,RPL36,RPL38,RPS11,RPS9,RPS5,RPS6,CACNB2,RPL27,RPL29,MYL9,RPL28,UBB,RPS25,GRB2,COL9A2,RPS21,RPS4X,RPL13A,RHOA,CXCR4,RPS3,RPL13,RPL18,FAU
Signaling by ROBO receptors	3.00E-15	0.121	RPL5,RPL30,RPL3,RPS16,RPS19,RPL36AL,RPS18,RPL36,RPL38,RPS11,RPS9,RPS5,RPS6,RPL27,RPL29,RPL28,UBB,RPS25,RPS21,RPS4X,RPL13A,RHOA,CXCR4,RPS3,RPL13,RPL18,FAU
Axon guidance	3.00E-15	0.058	RPL5,RPL30,RPL3,RPS16,RPS19,RPL36AL,RPS18,RPL36,RPL38,RPS11,RPS9,RPS5,RPS6,CACNB2,RPL27,RPL29,MYL9,RPL28,UBB,RPS25,GRB2,COL9A2,RPS21,RPS4X,RPL13A,RHOA,CXCR4,RPS3,RPL13,RPL18,FAU
Regulation of expression of SLITs and ROBOs	3.00E-15	0.141	RPL5,RPL30,RPL3,RPS16,RPS19,RPL36AL,RPS18,RPL36,RPL38,RPS11,RPS9,RPS5,RPS6,RPL27,RPL29,RPL28,UBB,RPS25,RPS21,RPS4X,RPL13A,RPS3,RPL13,RPL18,FAU
Immune system
Interferon gamma signaling	2.88E-06	0.097	HLA-A,HLA-E,HLA-DQA2,HLA-DQA1,HLA-DRB5,HLA-DQB2,HLA-DQB1,CAMK2D,PTPN1
MHC class II antigen presentation	9.48E-06	0.083	HLA-DOB,HLA-DQA2,HLA-DQA1,HLA-DRB5,ARF1,CTSH,HLA-DQB2,HLA-DQB1,HLA-DMA
Adaptive Immune System	4.21E-05	0.026	CD81,HLA-DOB,HLA-A,HLA-E,S100A9,RASGRP3,CD79B,CD79A,UBB,SLAMF6,HLA-DQA2,HLA-DQA1,HLA-DRB5,GRB2,CD200,CD22,ARF1,CTLA4,CTSH,HLA-DQB2,HLA-DQB1,HLA-DMA
Cytokine Signaling in Immune system	4.92E-05	0.028	IL4R,HLA-A,HLA-E,UBB,HLA-DQA2,HLA-DQA1,HLA-DRB5,JUN,BCL2,GRB2,ARF1,TNFRSF13B,FCER2,PELI1,HLA-DQB2,VAMP2,HLA-DQB1,CAMK2D,IL2RG,PTPN1
Translocation of ZAP-70 to Immunological synapse	6.87E-05	0.192	HLA-DQA2,HLA-DQA1,HLA-DRB5,HLA-DQB2,HLA-DQB1
Costimulation by the CD28 family	8.90E-05	0.092	HLA-DQA2,HLA-DQA1,HLA-DRB5,GRB2,CTLA4,HLA-DQB2,HLA-DQB1
Phosphorylation of CD3 and TCR zeta chains	1.10E-04	0.172	HLA-DQA2,HLA-DQA1,HLA-DRB5,HLA-DQB2,HLA-DQB1
PD-1 signaling	1.22E-04	0.167	HLA-DQA2,HLA-DQA1,HLA-DRB5,HLA-DQB2,HLA-DQB1
Interferon Signaling	2.09E-04	0.049	HLA-A,HLA-E,UBB,HLA-DQA2,HLA-DQA1,HLA-DRB5,HLA-DQB2,HLA-DQB1,CAMK2D,PTPN1
Generation of second messenger molecules	5.09E-04	0.122	HLA-DQA2,HLA-DQA1,HLA-DRB5,HLA-DQB2,HLA-DQB1
Downstream TCR signaling	4.89E-03	0.057	UBB,HLA-DQA2,HLA-DQA1,HLA-DRB5,HLA-DQB2,HLA-DQB1
TCR signaling	0.012	0.047	UBB,HLA-DQA2,HLA-DQA1,HLA-DRB5,HLA-DQB2,HLA-DQB1
Metabolism
Selenoamino acid metabolism	3.00E-15	0.197	RPL5,RPL30,RPL3,RPS16,RPS19,RPL36AL,RPS18,RPL36,RPL38,RPS11,RPS9,RPS5,RPS6,RPL27,RPL29,RPL28,RPS25,RPS21,RPS4X,RPL13A,RPS3,RPL13,RPL18,FAU
Selenocysteine synthesis	3.00E-15	0.245	RPL5,RPL30,RPL3,RPS16,RPS19,RPL36AL,RPS18,RPL36,RPL38,RPS11,RPS9,RPS5,RPS6,RPL27,RPL29,RPL28,RPS25,RPS21,RPS4X,RPL13A,RPS3,RPL13,RPL18,FAU
Metabolism of amino acids and derivatives	4.04E-14	0.066	RPL5,RPL30,RPL3,RPS16,RPS19,RPL36AL,RPS18,RPL36,RPL38,RPS11,RPS9,TSTD1,RPS5,RPS6,RPL27,RPL29,RPL28,RPS25,RPS21,RPS4X,RPL13A,RPS3,RPL13,RPL18,FAU
Metabolism of Proteins
L13a-mediated translational silencing of Ceruloplasmin expression	3.00E-15	0.207	RPL5,RPL30,RPL3,RPS16,RPS19,RPL36AL,RPS18,RPL36,RPL38,RPS11,RPS9,RPS5,RPS6,RPL27,RPL29,RPL28,RPS25,RPS21,RPS4X,RPL13A,RPS3,RPL13,RPL18,FAU
GTP hydrolysis and joining of the 60S ribosomal subunit	3.00E-15	0.205	RPL5,RPL30,RPL3,RPS16,RPS19,RPL36AL,RPS18,RPL36,RPL38,RPS11,RPS9,RPS5,RPS6,RPL27,RPL29,RPL28,RPS25,RPS21,RPS4X,RPL13A,RPS3,RPL13,RPL18,FAU
Peptide chain elongation	3.00E-15	0.266	RPL5,RPL30,RPL3,RPS16,RPS19,RPL36AL,RPS18,RPL36,RPL38,RPS11,RPS9,RPS5,RPS6,RPL27,RPL29,RPL28,EEF2,RPS25,RPS21,RPS4X,RPL13A,RPS3,RPL13,RPL18,FAU
Formation of a pool of free 40S subunits	3.00E-15	0.226	RPL5,RPL30,RPL3,RPS16,RPS19,RPL36AL,RPS18,RPL36,RPL38,RPS11,RPS9,RPS5,RPS6,RPL27,RPL29,RPL28,RPS25,RPS21,RPS4X,RPL13A,RPS3,RPL13,RPL18,FAU
Eukaryotic Translation Elongation	3.00E-15	0.253	RPL5,RPL30,RPL3,RPS16,RPS19,RPL36AL,RPS18,RPL36,RPL38,RPS11,RPS9,RPS5,RPS6,RPL27,RPL29,RPL28,EEF2,RPS25,RPS21,RPS4X,RPL13A,RPS3,RPL13,RPL18,FAU
Eukaryotic Translation Termination	3.00E-15	0.245	RPL5,RPL30,RPL3,RPS16,RPS19,RPL36AL,RPS18,RPL36,RPL38,RPS11,RPS9,RPS5,RPS6,RPL27,RPL29,RPL28,RPS25,RPS21,RPS4X,RPL13A,RPS3,RPL13,RPL18,FAU
SRP-dependent cotranslational protein targeting to membrane	3.00E-15	0.202	RPL5,RPL30,RPL3,RPS16,RPS19,RPL36AL,RPS18,RPL36,RPL38,RPS11,RPS9,RPS5,RPS6,RPL27,RPL29,RPL28,RPS25,RPS21,RPS4X,RPL13A,RPS3,RPL13,RPL18,FAU
Eukaryotic Translation Initiation	3.00E-15	0.194	RPL5,RPL30,RPL3,RPS16,RPS19,RPL36AL,RPS18,RPL36,RPL38,RPS11,RPS9,RPS5,RPS6,RPL27,RPL29,RPL28,RPS25,RPS21,RPS4X,RPL13A,RPS3,RPL13,RPL18,FAU
Translation	3.00E-15	0.082	RPL5,RPL30,RPL3,RPS16,RPS19,RPL36AL,RPS18,RPL36,RPL38,RPS11,RPS9,RPS5,RPS6,RPL27,RPL29,RPL28,EEF2,RPS25,RPS21,RPS4X,RPL13A,RPS3,RPL13,RPL18,FAU
Cap-dependent Translation Initiation	3.00E-15	0.194	RPL5,RPL30,RPL3,RPS16,RPS19,RPL36AL,RPS18,RPL36,RPL38,RPS11,RPS9,RPS5,RPS6,RPL27,RPL29,RPL28,RPS25,RPS21,RPS4X,RPL13A,RPS3,RPL13,RPL18,FAU
Formation of the ternary complex, and subsequently, the 43S complex	1.52E-12	0.226	RPS16,RPS19,RPS18,RPS11,RPS9,RPS5,RPS6,RPS25,RPS21,RPS4X,RPS3,FAU
Ribosomal scanning and start codon recognition	5.89E-12	0.2	RPS16,RPS19,RPS18,RPS11,RPS9,RPS5,RPS6,RPS25,RPS21,RPS4X,RPS3,FAU
Translation initiation complex formation	5.89E-12	0.2	RPS16,RPS19,RPS18,RPS11,RPS9,RPS5,RPS6,RPS25,RPS21,RPS4X,RPS3,FAU
Activation of the mRNA upon binding of the cap-binding complex and eIFs, and subsequent binding to 43S	7.14E-12	0.197	RPS16,RPS19,RPS18,RPS11,RPS9,RPS5,RPS6,RPS25,RPS21,RPS4X,RPS3,FAU
Metabolism of RNA
Nonsense-Mediated Decay (NMD)	3.00E-15	0.208	RPL5,RPL30,RPL3,RPS16,RPS19,RPL36AL,RPS18,RPL36,RPL38,RPS11,RPS9,RPS5,RPS6,RPL27,RPL29,RPL28,RPS25,RPS21,RPS4X,RPL13A,RPS3,RPL13,RPL18,PNRC2,FAU
Major pathway of rRNA processing in the nucleolus and cytosol	3.00E-15	0.127	RPL5,RPL30,RPL3,RPS16,RPS19,RPL36AL,RPS18,RPL36,RPL38,RPS11,RPS9,RPS5,RPS6,RPL27,RPL29,RPL28,RPS25,RPS21,RPS4X,RPL13A,RPS3,RPL13,RPL18,FAU
rRNA processing	3.00E-15	0.101	RPL5,RPL30,RPL3,RPS16,RPS19,RPL36AL,RPS18,RPL36,RPL38,RPS11,RPS9,RPS5,RPS6,RPL27,RPL29,RPL28,RPS25,RPS21,RPS4X,RPL13A,RPS3,RPL13,RPL18,FAU
Nonsense Mediated Decay (NMD) enhanced by the Exon Junction Complex (EJC)	3.00E-15	0.208	RPL5,RPL30,RPL3,RPS16,RPS19,RPL36AL,RPS18,RPL36,RPL38,RPS11,RPS9,RPS5,RPS6,RPL27,RPL29,RPL28,RPS25,RPS21,RPS4X,RPL13A,RPS3,RPL13,RPL18,PNRC2,FAU
rRNA processing in the nucleus and cytosol	3.00E-15	0.121	RPL5,RPL30,RPL3,RPS16,RPS19,RPL36AL,RPS18,RPL36,RPL38,RPS11,RPS9,RPS5,RPS6,RPL27,RPL29,RPL28,RPS25,RPS21,RPS4X,RPL13A,RPS3,RPL13,RPL18,FAU
Nonsense Mediated Decay (NMD) independent of the Exon Junction Complex (EJC)	3.00E-15	0.240	RPL5,RPL30,RPL3,RPS16,RPS19,RPL36AL,RPS18,RPL36,RPL38,RPS11,RPS9,RPS5,RPS6,RPL27,RPL29,RPL28,RPS25,RPS21,RPS4X,RPL13A,RPS3,RPL13,RPL18,FAU
Programmed Cell Death
BH3-only proteins associate with and inactivate anti-apoptotic BCL-2 members	0.039	0.222	PMAIP1,BCL2
Signal Transduction
Negative regulation of MET activity	0.012	0.143	UBB,GRB2,PTPN1
Vesicle-mediated Transport
Golgi Associated Vesicle Biogenesis	0.022	0.071	FTL,TXNDC5,ARF1,VAMP2

## Sheet: SUPPLEMENTARY TABLE S7
Supplementary Table S7. CLL patients characteristics
									% Apoptosis by Annexin/PI binding assay
Pt. No #	Age	Sex	Rai/	FISHa	IgHV Statusb	NOTCH1 mutation (ddPCR)	SF3B1 mutation	CD38+c/	DMSO	CURC	% increase apoptosis
			Binet					ZAP70+d
1	56	M	ND	NORM	UM	M (0.49%)	WT	neg/ND	35.7	63.6	78.15
2	76	M	II/A	NORM	UM	WT	M (p.G742D)	neg/neg	33.7	49.7	47.48
3	75	M	0/A	12+/DEL11	UM	M (43.8%)	WT	neg/pos	44.3	86.7	95.71
4	80	F	0/A	NA	UM	M(0.11%)	M (p.K700E)	neg/neg	23.4	71.8	206.84
5	61	M	0/A	DEL13	M	M (0,33%)	WT	neg/pos	66.1	91.7	38.73
6	52	M	II/B	NORM	UM	M (86.6%)	WT	pos/pos	31.6	77.4	144.94
7	76	M	II/B	12+	UM	M (1.87%)	WT	neg/pos	44.6	78.4	75.78
8	60	M	0/A	DEL13	UM	WT	WT	neg/pos	64.1	86.8	35.41
9	ND	M	0/A	12+	UM	M (47,5%)	WT	ND/pos	68.6	83.3	21.43
10	ND	M	ND	ND	UM	M (13.3%)	ND	ND	44	71.9	63.41
11	53	M	II/A	NORM	M	M (0,21%)	WT	neg/pos	42.6	58	36.15
12	65	F	0/A	DEL13	M	WT	WT	neg/neg	44.7	52.9	18.34
13	53	F	I/A	DEL13	UM	WT (0,018%)	WT	neg/neg	46.4	63.4	36.64
14	82	M	0/A	DEL13	UM	M (41,4%)	WT	neg/pos	53.7	75.4	40.41
15	70	M	I/A	12+/DEL13	M	M (0,07%)	WT	ND	50.8	82	61.42
16	47	F	0/A	12+	UM	M (3.5%)	ND	neg/pos	46.4	82.8	78.45
17	69	F	II/B	DEL13	UM	M (0,05%)	WT	neg/pos	37.1	85.7	131.00
18	83	M	II/A	DEL13	UM	WT (0,004%)	WT	neg/pos	50.9	60	17.88
19	56	M	II/B	NORM	UM	M (0,1%)	WT	neg/neg	55	76.9	39.82
20	53	F	ND	ND	M	WT (0,07%)	WT	ND	60.9	64.6	6.08
21	84	F	III/C	NORM	M	M (3,39%)	ND	pos/neg	44.6	91.3	104.71
22	88	M	II/B	12+	UM	M (32%)	ND	neg/pos	73.3	95.5	30.29
23	70	M	II/B	DEL13	M	WT (0.008%)	ND	ND	19.7	35	77.66
24	83	M	III/C	DEL11	UM	WT	WT	neg/pos	38.3	55.9	45.95
25	65	M	0/B	DEL11	UM	WT(0.007%)	WT	pos/neg	65.5	79.3	21.07
26	85	F	I/A	DEL13	M	WT (0,015%)	ND	neg/neg	27.3	37.6	37.73
27	71	F	0/A	12+	UM	M (45,4%)	WT	neg/pos	37.4	63.8	70.59
28	82	F	0/A	ND	UM	M (45.3%)	ND	ND	42.1	51.5	22.33
29	57	F	I/A	DEL13	M	WT	WT	neg/pos	67.4	87.2	29.38
30	77	M	0/A	DEL17	M	M (0.041%)	ND	neg/pos	60.2	70.2	16.61
31	72	M	0/A	DEL13	M	WT	ND	neg/neg	25.2	37.8	50.00
32	73	M	0/A	NORM	UM	M (9.1%)	WT	neg/pos	55.3	88.3	59.67
33	84	M	0/A	12+/DEL13	UM	M (16.7%)	ND	neg/ND	58.7	80.9	37.82
34	ND	M	ND	ND	ND	M (49%)	ND	ND	45	89	97.78
35	51	M	II/B	DEL13	M	WT	ND	neg/pos	38.7	40.1	3.62
36	ND	F	ND	ND	ND	M (33.3%)	ND	ND	51.2	88.1	72.07
Abbreviations: M, mutated; neg, negative; ND, not determined; pos, positive; UM, unmutated. a Assessed by FISH. b Mutated was defined as having a frequency of mutations >2% from germline VH. c Positivity refers to detection of >20% CD38+/CD19+. d Positivity refers to detection of >20% ZAP70+/CD19+.
